# Supplementary material for: Transcriptome Analysis of Human Diabetic Kidney Disease
Source: Oxford University Press journal article supplement (doi:10.2337/db10-1181), 2011-07-14
Supplement: db101181supplementarydata2.doc [file db101181supplementarydata2.doc]

Table 1: List of differentially expressed transcripts in kidneys of healthy glomeruli and tubuli. Statistical significance was determined by using unpaired t-test and Benjamini-Hochberg multiple testing correction p value <0.05 and fold change>1.5. 3,066 transcripts.

Probe Set ID Fold change Gene Symbol

1487_at -1.58024 ESRRA

1598_g_at 1.886039 GAS6 ///

LOC100133684

200000_s_at 1.625666 PRPF8

200014_s_at 1.673426 HNRNPC

200015_s_at 1.630487 SEPT2

200033_at 2.030386 DDX5

200037_s_at 1.575172 CBX3 /// LOC653972

200041_s_at 1.514787 BAT1

200050_at 1.573733 ZNF146

200051_at 1.553333 SART1

200059_s_at 1.912943 RHOA

200066_at 1.861054 IK

200072_s_at 2.190264 HNRNPM

200081_s_at -1.63238 RPS6

200084_at 1.816054 C11orf58

200090_at 1.676989 FNTA

200598_s_at 1.68133 HSP90B1

200599_s_at 2.864215 HSP90B1

200601_at 2.892745 ACTN4

200606_at -1.67968 DSP

200608_s_at 1.746286 RAD21

200615_s_at 1.882552 AP2B1

200621_at 3.874949 CSRP1

200624_s_at 1.611809 MATR3

200625_s_at 1.502042 CAP1

200628_s_at 1.534681 WARS

200629_at 1.981175 WARS

200640_at 1.853745 YWHAZ

200648_s_at 1.595052 GLUL

200649_at 1.642445 NUCB1

200659_s_at -1.83289 PHB

200660_at 2.095993 S100A11

200662_s_at 1.871814 TOMM20

200664_s_at -1.64863 DNAJB1

200665_s_at 7.584482 SPARC

200666_s_at -1.97373 DNAJB1

200675_at 3.42397 CD81

200685_at 1.911579 SFRS11

200694_s_at 1.506904 DDX24

200697_at 1.67593 HK1

200703_at 2.038495 DYNLL1

200712_s_at 1.847064 MAPRE1

200723_s_at 2.23017 CAPRIN1

200731_s_at -1.66553 PTP4A1

200733_s_at -1.60017 PTP4A1

200755_s_at 1.630381 CALU

200757_s_at 1.553002 CALU

200762_at 2.56377 DPYSL2

200764_s_at 1.699533 CTNNA1

200765_x_at2.003563 CTNNA1

200771_at 1.611579 LAMC1

200778_s_at 1.963206 SEPT2

200780_x_at2.097831 GNAS

200782_at 2.062013 ANXA5

200787_s_at 2.832558 PEA15

200788_s_at 6.600673 PEA15

200791_s_at 2.499186 IQGAP1

200792_at 1.561428 XRCC6

200800_s_at 1.927843 HSPA1A /// HSPA1B

200813_s_at 1.682077 PAFAH1B1

200816_s_at 2.284931 PAFAH1B1

200821_at 1.899605 LAMP2

200822_x_at-1.76735 TPI1

200848_at -1.62233 AHCYL1

200859_x_at1.518572 FLNA

200862_at -1.67236 DHCR24

200863_s_at 1.556976 RAB11A

200864_s_at 2.506949 RAB11A

200872_at 1.535762 S100A10

200875_s_at 1.739433 NOP56

200878_at 2.507968 EPAS1

200881_s_at 1.83417 DNAJA1

200887_s_at 3.980297 STAT1

200892_s_at 1.555658 SFRS10

200895_s_at -1.50289 FKBP4

200897_s_at 4.302539 PALLD

200904_at 4.4451 HLA-E

200905_x_at2.682793 HLA-E

200906_s_at 3.677896 PALLD

200907_s_at 3.591954 PALLD

200915_x_at1.745664 KTN1

200923_at 2.195435 LGALS3BP

200931_s_at 2.36623 VCL

200934_at 1.779993 DEK

200943_at 1.823342 HMGN1

200944_s_at 1.521457 HMGN1 /// LOC643790

200947_s_at -1.86788 GLUD1

200953_s_at 2.002475 CCND2

200964_at 1.93061 UBA1

200965_s_at -1.84462 ABLIM1

200975_at 1.665328 PPT1

200981_x_at2.084075 GNAS

200985_s_at 1.654317 CD59

200986_at 2.360837 SERPING1

200998_s_at 1.779098 CKAP4

200999_s_at 2.672442 CKAP4

201008_s_at 1.84531 TXNIP

201010_s_at 2.197926 TXNIP

201012_at 9.288803 ANXA1

201021_s_at 1.892181 DSTN

201022_s_at 1.761821 DSTN

201023_at 2.239785 TAF7

201024_x_at1.905243 EIF5B

201028_s_at 1.7577 CD99

201029_s_at 1.741231 CD99

201034_at 1.613673 ADD3

201035_s_at -1.50321 HADH

201041_s_at 2.541455 DUSP1

201042_at 1.563331 TGM2

201050_at 2.308912 PLD3

201054_at 2.178875 HNRNPA0

201056_at 1.546277 GOLGB1

201057_s_at 1.590564 GOLGB1

201058_s_at 12.40184 MYL9

201063_at 1.860671 RCN1

201071_x_at1.702556 SF3B1

201088_at 1.549322 KPNA2 /// LOC728860

201092_at 1.514439 RBBP7

201105_at 7.844392 LGALS1

201109_s_at 1.79358 THBS1

201113_at -1.62127 TUFM

201124_at 5.316046 ITGB5

201125_s_at 2.80476 ITGB5

201126_s_at 1.500217 MGAT1

201136_at 2.659889 PLP2

201137_s_at 1.942056 HLA-DPB1

201138_s_at 1.754664 SSB

201139_s_at 2.615934 SSB

201141_at 5.592254 GPNMB

201142_at 1.517796 EIF2S1

201146_at 2.083005 NFE2L2

201147_s_at 3.122623 TIMP3

201150_s_at 4.710672 TIMP3

201157_s_at 1.568511 NMT1

201160_s_at 2.002859 CSDA

201161_s_at 2.09598 CSDA

201162_at 2.094673 IGFBP7

201169_s_at -1.63498 BHLHE40

201174_s_at 1.98607 TERF2IP

201176_s_at 1.732416 ARCN1

201177_s_at 2.137722 UBA2

201179_s_at 1.622417 GNAI3

201181_at 1.882457 GNAI3

201185_at 10.22637 HTRA1

201191_at 1.585407 PITPNA

201195_s_at -1.72993 SLC7A5

201199_s_at 2.038961 PSMD1

201209_at 1.848982 HDAC1

201214_s_at 1.570269 PPP1R7

201215_at 2.466625 PLS3

201218_at 1.879777 CTBP2

201223_s_at 2.048255 RAD23B

201230_s_at 1.607645 ARIH2

201234_at 1.571426 ILK

201242_s_at -1.96832 ATP1B1

201261_x_at5.283478 BGN

201266_at 1.727011 TXNRD1

201281_at 1.542188 ADRM1

201282_at -1.50746 OGDH

201286_at -2.34877 SDC1

201287_s_at -2.35149 SDC1

201288_at 2.814095 ARHGDIB

201307_at 3.633442 SEPT11

201315_x_at 4.03028 IFITM2

201318_s_at 2.217372 MRCL3 /// MRLC2

201319_at 2.021416 MRCL3

201321_s_at 1.513856 SMARCC2

201328_at 5.528884 ETS2

201329_s_at 1.517581 ETS2

201333_s_at 1.718178 ARHGEF12

201334_s_at 2.709659 ARHGEF12

201335_s_at 5.481752 ARHGEF12

201336_at 1.78093 VAMP3

201340_s_at 1.776542 ENC1

201341_at 2.096651 ENC1

201351_s_at 1.644761 YME1L1

201361_at 1.679691 TMEM109

201362_at -1.66885 IVNS1ABP

201363_s_at -1.73323 IVNS1ABP

201372_s_at 1.50328 CUL3

201375_s_at 1.8518 PPP2CB

201408_at 2.159432 PPP1CB

201411_s_at -1.77923 PLEKHB2

201412_at 1.89305 LRP10

201415_at -1.79875 GSS

201418_s_at -1.52089 SOX4

201426_s_at 15.79037 VIM

201431_s_at 11.34172 DPYSL3

201432_at -1.65441 CAT

201440_at 1.543916 DDX23

201453_x_at2.163441 RHEB

201462_at 2.266811 SCRN1

201467_s_at 4.748787 NQO1

201468_s_at 4.821862 NQO1

201474_s_at 5.248874 ITGA3

201485_s_at 2.412064 RCN2

201486_at 2.593023 RCN2

201489_at -1.98023 PPIF

201502_s_at 1.640595 NFKBIA

201518_at 1.75999 CBX1

201525_at 5.66986 APOD

201528_at 1.751781 RPA1

201532_at 2.068839 PSMA3

201540_at 5.240689 FHL1

201542_at 1.609575 SAR1A

201550_x_at1.652468 ACTG1

201554_x_at 2.41511 GYG1

201562_s_at -2.44855 SORD

201572_x_at2.193933 DCTD

201574_at 1.610954 ETF1

201578_at 21.97311 PODXL

201579_at 2.165023 FAT1

201581_at 2.547543 TXNDC13

201585_s_at -1.54659 SFPQ

201590_x_at9.462702 ANXA2

201591_s_at 1.715526 NISCH

201594_s_at 1.503563 PPP4R1

201601_x_at 2.94298 IFITM1

201603_at 1.601429 PPP1R12A

201607_at 1.514952 PWP1

201620_at 1.613995 MBTPS1

201634_s_at 1.731988 CYB5B

201641_at 9.266906 BST2

201647_s_at 1.722979 SCARB2

201648_at 1.508016 JAK1

201649_at 2.320838 UBE2L6

201660_at 1.757187 ACSL3

201661_s_at 2.644803 ACSL3

201664_at 1.564419 SMC4

201666_at 9.511712 TIMP1

201667_at 12.00738 GJA1

201670_s_at -1.53482 MARCKS

201674_s_at -1.54221 AKAP1

201675_at -1.60355 AKAP1

201678_s_at 2.194877 C3orf37

201681_s_at 2.383447 DLG5

201685_s_at 1.511193 TOX4

201691_s_at 1.834989 TPD52

201696_at 1.640085 SFRS4

201697_s_at 1.609387 DNMT1

201699_at 1.887905 PSMC6

201700_at 1.565026 CCND3

201707_at 1.798705 PEX19

201708_s_at -1.77847 NIPSNAP1

201721_s_at 2.100709 LAPTM5

201725_at 1.529516 CDC123

201730_s_at 2.023314 TPR

201734_at 1.616273 CLCN3

201735_s_at 1.786605 CLCN3

201751_at 1.809579 JOSD1

201761_at 10.77658 MTHFD2

201773_at 1.800102 ADNP

201778_s_at 1.757331 KIAA0494

201780_s_at 1.540076 RNF13

201783_s_at 1.54132 RELA

201784_s_at 1.580802 C11orf58

201785_at 2.426305 RNASE1

201788_at 1.581926 DDX42

201798_s_at 4.728317 MYOF

201804_x_at1.514191 TBCB

201807_at 1.882629 VPS26A

201809_s_at 3.010414 ENG

201811_x_at1.699166 SH3BP5

201814_at 1.799302 TBC1D5

201818_at 1.978656 LPCAT1

201828_x_at1.616892 FAM127A

201832_s_at 2.191671 USO1

201836_s_at 1.506653 SUPT7L

201842_s_at 3.624883 EFEMP1

201843_s_at 3.708767 EFEMP1

201845_s_at 1.595871 RYBP

201847_at 1.888542 LIPA

201848_s_at -1.51704 BNIP3

201852_x_at3.371301 COL3A1

201853_s_at 1.82428 CDC25B

201857_at 1.693208 ZFR

201858_s_at 2.331252 SRGN

201859_at 2.268806 SRGN

201860_s_at 14.25125 PLAT

201861_s_at 2.136297 LRRFIP1

201862_s_at 2.325598 LRRFIP1

201865_x_at 1.844861 NR3C1

201876_at 4.169632 PON2

201877_s_at 1.955741 PPP2R5C

201880_at 1.574099 ARIH1

201883_s_at -1.63266 B4GALT1

201885_s_at 1.513164 CYB5R3

201886_at -2.08776 WDR23

201887_at 2.535621 IL13RA1

201891_s_at 1.536247 B2M

201893_x_at 9.085072 DCN

201904_s_at 3.603885 CTDSPL

201905_s_at 1.716437 CTDSPL

201906_s_at 3.866699 CTDSPL

201914_s_at 1.875977 SEC63

201925_s_at 3.286557 CD55

201926_s_at 1.831868 CD55

201930_at 12.24476 MCM6

201938_at 1.602698 CDK2AP1

201939_at 1.653703 PLK2

201941_at 2.161517 CPD

201944_at 1.930897 HEXB

201948_at 1.780387 GNL2

201959_s_at 1.654723 MYCBP2

201964_at 1.550469 SETX

201975_at 1.584699 CLIP1

201991_s_at 2.186544 KIF5B

201997_s_at 1.551577 SPEN

202004_x_at-1.55715 SDHC

202005_at -1.60376 ST14

202006_at 2.844677 PTPN12

202011_at 6.533039 TJP1

202012_s_at 1.892048 EXT2

202013_s_at 2.537085 EXT2

202020_s_at 1.980118 LANCL1

202035_s_at -1.68725 SFRP1

202036_s_at -3.28754 SFRP1

202037_s_at -2.25566 SFRP1

202043_s_at -1.98143 SMS

202051_s_at 1.676908 ZMYM4

202052_s_at 3.223808 RAI14

202055_at 1.681146 KPNA1

202060_at 1.953191 CTR9

202061_s_at 2.776391 SEL1L

202063_s_at 1.698135 SEL1L

202066_at 1.624855 PPFIA1

202073_at 1.811401 OPTN

202075_s_at 5.520679 PLTP

202082_s_at 2.37744 SEC14L1

202083_s_at 2.54364 SEC14L1

202084_s_at 2.620598 SEC14L1

202086_at 2.0215 MX1

202088_at 1.695308 SLC39A6

202098_s_at 2.093521 PRMT2

202106_at 1.923585 GOLGA3

202118_s_at -1.67892 CPNE3

202125_s_at 1.824609 TRAK2

202136_at 1.550982 ZMYND11

202149_at 3.054606 NEDD9

202150_s_at 1.757035 NEDD9

202163_s_at 1.648375 CNOT8

202166_s_at 1.848493 PPP1R2

202171_at 1.512107 VEZF1

202172_at 1.557934 VEZF1

202173_s_at 1.754798 VEZF1

202174_s_at 1.959292 PCM1

202177_at 2.514758 GAS6 ///

LOC100133684

202181_at 1.816502 KIAA0247

202184_s_at 1.60204 NUP133

202185_at 1.621003 PLOD3

202193_at 3.300255 LIMK2

202197_at 1.704828 MTMR3

202204_s_at -1.5197 AMFR

202213_s_at 1.648073 CUL4B

202219_at -2.02109 SLC6A8

202228_s_at 2.122849 NPTN

202231_at 2.255419 EIF3M

202232_s_at 3.634445 EIF3M

202234_s_at -2.40159 SLC16A1

202235_at -1.6514 SLC16A1

202242_at 1.763087 TSPAN7

202250_s_at 1.968131 WDR42A

202258_s_at 1.502891 N4BP2L2

202259_s_at 1.757427 N4BP2L2

202260_s_at 2.781241 STXBP1

202269_x_at1.688625 GBP1

202273_at 2.91997 PDGFRB

202279_at -1.85773 C14orf2

202289_s_at 3.092452 TACC2

202291_s_at 5.230815 MGP

202295_s_at -1.57099 CTSH

202303_x_at1.854229 SMARCA5

202305_s_at 1.621806 FEZ2

202307_s_at 1.857967 TAP1

202318_s_at 2.104404 SENP6

202321_at 1.566731 GGPS1

202324_s_at 1.549781 ACBD3

202332_at 1.819824 CSNK1E

202336_s_at 2.148354 PAM

202341_s_at -1.67806 TRIM2

202342_s_at -1.92829 TRIM2

202345_s_at 3.338341 FABP5 /// FABP5L2 ///

FABP5L7

202351_at 4.888348 ITGAV

202353_s_at 1.867701 PSMD12

202355_s_at 1.535676 GTF2F1

202359_s_at 1.638537 SNX19

202363_at 21.86215 SPOCK1

202366_at -1.85851 ACADS

202368_s_at 3.135905 TRAM2

202369_s_at 8.436528 TRAM2

202372_at 1.614584 RAB3GAP2

202373_s_at 2.085082 RAB3GAP2

202375_at 1.690959 SEC24D

202377_at 3.018206

202378_s_at 1.778618 LEPROT

202381_at 1.732618 ADAM9

202382_s_at -1.53784 GNPDA1

202388_at 2.138362 RGS2

202411_at 4.536046 IFI27

202413_s_at 2.160183 USP1

202414_at 1.614985 ERCC5

202421_at -1.72682 IGSF3

202423_at 1.701472 MYST3

202429_s_at 1.62069 PPP3CA

202435_s_at 2.672805 CYP1B1

202436_s_at 2.988318 CYP1B1

202437_s_at 3.594341 CYP1B1

202442_at 1.600772 AP3S1

202443_x_at3.180371 NOTCH2

202455_at 1.673653 HDAC5

202466_at 1.947056 POLS

202468_s_at 2.364893 CTNNAL1

202478_at 6.116452 TRIB2

202479_s_at 2.90541 TRIB2

202481_at 2.081723 DHRS3

202484_s_at 2.400586 MBD2

202487_s_at 1.537682 H2AFV

202491_s_at 1.965382 IKBKAP

202499_s_at 2.800595 SLC2A3

202503_s_at 2.352672 KIAA0101

202512_s_at 1.710478 ATG5

202519_at 1.941598 MLXIP

202522_at 1.549099 PITPNB

202523_s_at 2.763481 SPOCK2

202524_s_at 11.55059 SPOCK2

202525_at -1.95795 PRSS8

202537_s_at 1.717573 CHMP2B

202544_at 1.649212 GMFB

202551_s_at 2.836233 CRIM1

202552_s_at 2.845026 CRIM1

202554_s_at -2.0517 GSTM3

202555_s_at 3.484482 MYLK

202557_at 2.993573 HSPA13

202561_at 2.119678 TNKS

202587_s_at 1.688072 AK1

202597_at -1.76487 IRF6

202602_s_at 1.789177 HTATSF1

202620_s_at 1.834772 PLOD2

202622_s_at 1.602482 ATXN2

202625_at 1.629172 LYN

202630_at 2.596605 APPBP2

202633_at 2.047746 TOPBP1

202636_at 1.724316 RNF103

202637_s_at 1.847138 ICAM1

202638_s_at 1.797593 ICAM1

202656_s_at 1.748762 SERTAD2

202659_at 2.184714 PSMB10

202660_at -1.75009 ITPR2

202666_s_at 1.753661 ACTL6A

202668_at 8.471963 EFNB2

202669_s_at 4.245332 EFNB2

202678_at 3.216345 GTF2A2

202686_s_at 4.855351 AXL

202690_s_at 1.564633 SNRPD1

202696_at 1.51113 OXSR1

202701_at 1.593585 BMP1

202718_at 15.28916 IGFBP2

202727_s_at 2.297436 IFNGR1

202735_at -1.76907 EBP

202741_at 1.500177 PRKACB

202743_at 1.903993 PIK3R3

202746_at 2.622785 ITM2A

202747_s_at 1.705492 ITM2A

202748_at 1.574342 GBP2

202749_at 2.074482 WRB

202753_at 1.7228 PSMD6

202761_s_at 2.287529 SYNE2

202767_at -1.83256 ACP2

202771_at 4.032844 FAM38A

202776_at 1.59372 DNTTIP2

202788_at -1.58238 MAPKAPK3

202790_at -1.80654 CLDN7

202795_x_at1.529675 TRIOBP

202796_at 14.86328 SYNPO

202798_at 2.091324 SEC24B

202804_at 3.329189 ABCC1

202806_at 1.974662 DBN1

202808_at 2.07801 C10orf26

202823_at 1.50533 TCEB1

202854_at 1.601383 HPRT1

202863_at 2.088926 SP100

202864_s_at 1.976193 SP100

202869_at 2.812247 OAS1

202871_at -1.87953 TRAF4

202883_s_at -1.87089 PPP2R1B

202890_at -1.668 MAP7

202897_at 5.961436 SIRPA

202901_x_at1.583414 CTSS

202908_at 4.265699 WFS1

202910_s_at 2.043547 CD97

202911_at 1.537136 MSH6

202912_at 1.69048 ADM

202915_s_at 1.98481 FAM20B

202916_s_at 3.234904 FAM20B

202917_s_at 10.86244 S100A8

202918_s_at 2.646442 MOBKL3

202919_at 1.799291 MOBKL3

202921_s_at -1.80712 ANK2

202923_s_at -1.55532 GCLC

202934_at 1.787548 HK2

202946_s_at 2.531392 BTBD3

202948_at 1.646756 IL1R1

202949_s_at 1.834625 FHL2

202957_at 1.856366 HCLS1

202967_at 1.601367 GSTA4

202972_s_at -1.77675 FAM13A1

202979_s_at 1.574925 CREBZF

202983_at 1.741519 HLTF

202985_s_at 1.54862 BAG5

202994_s_at -1.86354 FBLN1

203002_at 1.548558 AMOTL2

203008_x_at1.751188 TXNDC9

203020_at 2.035062 RABGAP1L

203029_s_at 5.096197 PTPRN2

203035_s_at 1.65902 PIAS3

203037_s_at 3.928689 MTSS1

203040_s_at -1.55321 HMBS

203048_s_at 1.535625 TTC37

203049_s_at 1.832092 TTC37

203050_at 1.519624 TP53BP1

203058_s_at -1.72307 PAPSS2

203062_s_at 1.532255 MDC1

203063_at 1.695023 PPM1F

203065_s_at 1.503657 CAV1

203071_at 3.608924 SEMA3B

203072_at 3.596729 MYO1E

203075_at 1.570209 SMAD2

203077_s_at 2.01688 SMAD2

203081_at 3.1992 CTNNBIP1

203087_s_at 1.797479 KIF2A

203097_s_at 1.524752 RAPGEF2

203098_at 2.31777 CDYL

203102_s_at 1.749987 MGAT2

203108_at 9.453111 GPRC5A

203120_at 2.072063 TP53BP2

203123_s_at -1.94395 SLC11A2

203126_at -1.86574 IMPA2

203132_at 1.551078 RB1

203137_at 2.023867 WTAP

203143_s_at 2.452049 KIAA0040

203144_s_at 1.755545 KIAA0040

203149_at 3.400755 PVRL2

203153_at 2.523463 IFIT1

203156_at 1.637832 AKAP11

203167_at 2.482102 TIMP2

203186_s_at 2.3176 S100A4

203187_at 1.589238 DOCK1

203188_at 2.166384 B3GNT1

203207_s_at -1.54343 MTFR1

203211_s_at 1.892555 MTMR2

203227_s_at 1.505545 TSPAN31

203232_s_at 1.731288 ATXN1

203233_at 1.654569 IL4R

203240_at -1.74639 FCGBP ///

LOC100133944

203243_s_at 4.56901 PDLIM5

203245_s_at 1.584225 NCRNA00094

203261_at 1.824498 DCTN6

203262_s_at 1.595631 FAM50A

203269_at 1.898903 NSMAF

203272_s_at -1.95525 TUSC2

203281_s_at 1.835274 UBA7

203284_s_at 1.893583 HS2ST1

203288_at 2.14346 KIAA0355

203296_s_at 2.365155 ATP1A2

203298_s_at 2.846963 JARID2

203299_s_at 2.91222 AP1S2

203300_x_at3.338508 AP1S2

203302_at 2.13704 DCK

203304_at 3.545031 BAMBI

203315_at 2.37742 NCK2

203320_at 1.846225 SH2B3

203323_at 3.103058 CAV2

203324_s_at 1.706671 CAV2

203335_at -1.57187 PHYH

203343_at -1.56587 UGDH

203353_s_at 1.516501 MBD1

203355_s_at 5.693527 PSD3

203364_s_at 1.557069 KIAA0652

203367_at 2.340603 DUSP14

203368_at 2.140518 CRELD1

203376_at 1.776541 CDC40

203386_at -2.102 TBC1D4

203387_s_at -1.70538 TBC1D4

203397_s_at -2.07351 GALNT3

203403_s_at 2.963297 RNF6

203404_at 1.983319 ARMCX2

203406_at 1.662281 MFAP1

203407_at -1.69394 PPL

203410_at 1.876491 AP3M2

203411_s_at 1.735378 LMNA

203415_at 1.678747 PDCD6

203424_s_at 3.404831 IGFBP5

203426_s_at 1.564825 IGFBP5

203427_at 1.832825 ASF1A

203428_s_at 1.516143 ASF1A

203429_s_at 2.350503 C1orf9

203434_s_at 3.037769 MME

203435_s_at 3.031166 MME

203438_at -1.71273 STC2

203439_s_at -1.53996 STC2

203440_at -1.61189 CDH2

203446_s_at 1.537469 OCRL

203449_s_at 1.772346 TERF1

203453_at -2.21956 SCNN1A

203458_at -1.63653 SPR

203473_at -2.14384 SLCO2B1

203474_at 3.446078 IQGAP2

203476_at 4.419157 TPBG

203500_at -2.04571 GCDH

203504_s_at -1.69882 ABCA1

203505_at -1.70273 ABCA1

203514_at 1.569721 MAP3K3

203518_at 1.961961 LYST

203525_s_at 2.539493 APC

203535_at 1.598084 S100A9

203548_s_at 2.773675 LPL

203549_s_at 4.196084 LPL

203552_at 1.995597 MAP4K5

203562_at 3.372634 FEZ1

203570_at 5.389903 LOXL1

203575_at 1.548633 CSNK2A2

203583_at 2.136888 UNC50

203584_at 2.016954 TTC35

203585_at 10.04203 ZNF185

203586_s_at -1.61965 ARL4D

203593_at 2.59656 CD2AP

203596_s_at 1.59583 IFIT5

203598_s_at 1.644293 WBP4

203603_s_at 2.907455 ZEB2

203604_at 1.590743 ZNF516

203609_s_at -1.57016 ALDH5A1

203614_at 1.666585 UTP14C

203615_x_at2.059799 SULT1A1

203620_s_at 3.696962 FCHSD2

203625_x_at1.512558 SKP2

203630_s_at 1.667653 COG5

203632_s_at -1.59559 GPRC5B

203636_at 1.537784 MID1

203637_s_at 1.594258 MID1

203640_at 1.772767 MBNL2

203642_s_at -1.82161 COBLL1

203656_at 1.583356 FIG4

203661_s_at 4.879142 TMOD1

203662_s_at 8.575779 TMOD1

203665_at -1.83095 HMOX1

203675_at 2.378684 NUCB2

203676_at -1.52442 GNS

203680_at 19.97371 PRKAR2B

203697_at 1.962089 FRZB

203698_s_at 1.530786 FRZB

203699_s_at -1.64965 DIO2

203700_s_at -1.53606 DIO2

203705_s_at 1.733992 FZD7

203706_s_at 2.392455 FZD7

203708_at 4.414553 PDE4B

203713_s_at -1.56566 LLGL2

203714_s_at 1.52016 TBCE

203716_s_at -1.73762 DPP4

203717_at -1.60421 DPP4

203722_at -1.84548 ALDH4A1

203725_at 1.824077 GADD45A

203729_at 2.100342 EMP3

203730_s_at 1.584207 ZKSCAN5

203741_s_at 2.7312 ADCY7

203748_x_at

3.968217 RBMS1

203753_at 2.014913 TCF4

203767_s_at 1.977693 STS

203769_s_at 1.719982 STS

203778_at 1.714096 MANBA

203786_s_at -1.95106 TPD52L1

203787_at 4.315994 SSBP2

203789_s_at 2.754383 SEMA3C

203796_s_at -1.75838 BCL7A

203797_at -1.59715 VSNL1

203799_at 2.332744 CD302

203801_at 1.880483 MRPS14

203810_at 1.587062 DNAJB4

203817_at 2.186247 GUCY1B3

203822_s_at 1.675784 ELF2

203840_at 1.587983 BLZF1

203845_at 2.513513 KAT2B

203853_s_at 2.362976 GAB2

203857_s_at 2.093153 PDIA5

203865_s_at 1.81098 ADARB1

203869_at 7.128138 USP46

203870_at 6.696399 USP46

203874_s_at 1.848031 SMARCA1

203881_s_at 4.669827 DMD

203889_at 1.580272 SCG5

203895_at 1.671204 PLCB4

203906_at 1.819061 IQSEC1

203907_s_at 1.555069 IQSEC1

203910_at 3.637548 ARHGAP29

203913_s_at 2.866471 HPGD

203914_x_at3.043427 HPGD

203915_at 3.860905 CXCL9

203917_at 5.860364 CXADR

203918_at -1.52573 PCDH1

203919_at 1.762138 TCEA2

203921_at 1.734032 CHST2

203928_x_at-1.69299 MAPT

203931_s_at -1.65119 MRPL12

203933_at -1.67271 RAB11FIP3

203934_at 4.409886 KDR

203939_at 1.608495 NT5E

203944_x_at 3.21756 BTN2A1

203945_at -1.9231 ARG2

203946_s_at -1.92257 ARG2

203947_at 1.565139 CSTF3

203956_at 1.755018 MORC2

203961_at 9.073769 NEBL

203962_s_at 15.79157 NEBL

203964_at 1.624276 NMI

203971_at -1.72716 SLC31A1

203980_at 2.46345 FABP4

203989_x_at 10.087 F2R

204004_at 2.126052 PAWR

204005_s_at 1.836605 PAWR

204007_at 3.578427 FCGR3B

204011_at 2.058719 SPRY2

204017_at 8.992446 KDELR3

204020_at 1.69949 PURA

204027_s_at -1.56566 METTL1

204030_s_at 1.943626 SCHIP1

204032_at 3.521813 BCAR3

204034_at 1.983107 ETHE1

204040_at 1.561746 RNF144A

204042_at 1.985589 WASF3

204043_at -1.72227 TCN2

204048_s_at 2.733151 PHACTR2

204049_s_at 3.220725 PHACTR2

204058_at 3.225584 ME1

204059_s_at 2.955063 ME1

204063_s_at 1.533184 ULK2

204067_at -1.51029 SUOX

204072_s_at 21.22796 FRY

204076_at 2.833032 ENTPD4

204082_at 1.992939 PBX3

204083_s_at 15.76007 TPM2

204085_s_at 1.654331 CLN5

204091_at 2.329107 PDE6D

204099_at 2.341525 SMARCD3

204105_s_at -1.73053 NRCAM

204114_at 3.038846 NID2

204115_at 3.286208 GNG11

204130_at -1.60844 HSD11B2

204136_at 1.659646 COL7A1

204141_at 2.037895 TUBB2A

204145_at 1.819816 FRG1

204151_x_at-1.89821 AKR1C1

204153_s_at 1.52564 MFNG

204158_s_at 2.036348 TCIRG1

204161_s_at 1.767509 ENPP4

204170_s_at -1.69851 CKS2

204171_at 1.73144 RPS6KB1

204184_s_at 1.836462 ADRBK2

204189_at -1.51412 RARG

204201_s_at 2.865848 PTPN13

204204_at 2.508092 SLC31A2

204205_at 2.80388 APOBEC3G

204220_at 3.260153 GMFG

204226_at 1.505518 STAU2

204235_s_at 4.950776 GULP1

204236_at 3.012356 FLI1

204237_at 3.414414 GULP1

204241_at -1.53917 ACOX3

204249_s_at 3.378555 LMO2

204255_s_at -1.98517 VDR

204262_s_at 1.564678 PSEN2

204268_at -2.01169 S100A2

204279_at 4.488044 PSMB9

204284_at 2.680101 PPP1R3C

204294_at -1.58849 AMT

204298_s_at 12.22105 LOX

204299_at 1.690976 FUSIP1 /// LOC642558

204301_at 2.125835 KBTBD11

204306_s_at 2.368539 CD151

204308_s_at 1.652873 KIAA0329

204316_at 1.891735 RGS10

204319_s_at 6.850414 RGS10

204324_s_at 4.559943 GOLIM4

204334_at 5.078411 KLF7

204337_at 1.918418 RGS4

204343_at 1.632727 ABCA3

204348_s_at -2.52393 AK3L1 /// AK3L2

204352_at 4.634277 TRAF5

204355_at 1.836185 DHX30

204359_at 5.89765 FLRT2

204363_at 14.04217 F3

204367_at 1.540595 SP2

204368_at 2.836504 SLCO2A1

204369_at 1.816676 PIK3CA

204375_at -1.50599 CLSTN3

204379_s_at -1.51787 FGFR3

204384_at 1.562003 GOLGA2

204388_s_at -1.69021 MAOA

204393_s_at -2.31056 ACPP

204396_s_at 11.31439 GRK5

204417_at 4.252907 GALC

204439_at 2.532071 IFI44L

204440_at -1.8456 CD83

204441_s_at 1.552816 POLA2

204446_s_at 4.116884 ALOX5

204447_at -1.87802 ProSAPiP1

204457_s_at 11.89797 GAS1

204464_s_at 2.482456 EDNRA

204466_s_at 19.54118 SNCA

204467_s_at 10.66393 SNCA

204479_at 1.842086 OSTF1

204482_at 7.207807 CLDN5

204504_s_at 1.577537 HIRIP3

204508_s_at -1.90806 CA12

204509_at -1.81992 CA12

204510_at 1.790414 CDC7

204511_at 1.733968 FARP2

204516_at 1.929673 ATXN7

204519_s_at -2.22298 PLLP

204523_at 1.705221 ZNF140

204526_s_at 1.719399 TBC1D8

204529_s_at -1.88584 TOX

204544_at 5.111596 HPS5

204547_at -1.53865 RAB40B

204554_at 1.623275 PPP1R3D

204557_s_at -1.52753 DZIP1

204561_x_at -1.6926 APOC2 /// APOC4

204563_at 2.019249 SELL

204579_at 1.699956 FGFR4

204584_at -2.30982 L1CAM

204595_s_at -3.20121 STC1

204597_x_at-3.20549 STC1

204600_at -1.67211 EPHB3

204607_at -2.33492 HMGCS2

204613_at 2.09239 PLCG2

204620_s_at 1.775026 VCAN

204627_s_at 3.712468 ITGB3

204628_s_at 1.776429 ITGB3

204637_at -2.01282 CGA

204638_at -1.75635 ACP5

204642_at 1.882352 S1PR1

204643_s_at 1.578619 ENOX2

204646_at 2.491665 DPYD

204647_at -1.56071 HOMER3

204648_at 1.651221 NPR1

204653_at -2.87671 TFAP2A

204670_x_at1.985934 HLA-DRB1 /// HLA-DRB2 /// HLA-DRB3 /// HLA-DRB4 /// HLA-DRB5 /// LOC100133484 /// LOC100133661 /// LOC100133811 /// LOC730415 /// RNASE2 /// ZNF749

204675_at -1.97316 SRD5A1

204677_at 2.53432 CDH5

204679_at -1.56855 KCNK1

204681_s_at 2.570152 RAPGEF5

204683_at 2.006362 ICAM2

204687_at -2.16395 DKFZP564O0823

204688_at 4.51312 SGCE

204689_at 1.674631 HHEX

204702_s_at 3.332638 NFE2L3

204712_at -1.5206 WIF1

204713_s_at 2.674541 F5

204714_s_at 17.42534 F5

204719_at -2.66789 ABCA8

204726_at 2.298846 CDH13

204730_at 2.316319 RIMS3

204731_at 7.971613 TGFBR3

204733_at 15.76552 KLK6

204735_at 2.433877 PDE4A

204739_at 1.593229 CENPC1

204744_s_at 2.101141 IARS

204749_at 3.891581 NAP1L3

204755_x_at-1.57577 HLF

204771_s_at 1.865274 TTF1

204773_at 1.949308 IL11RA

204777_s_at -2.8243 MAL

204791_at 1.734061 NR2C1

204796_at 3.508523 EML1

204797_s_at 2.717271 EML1

204805_s_at 2.126081 H1FX

204806_x_at2.066867 HLA-F

204817_at -1.85457 ESPL1

204820_s_at 2.695312 BTN3A2 /// BTN3A3

204821_at 2.150013 BTN3A3

204832_s_at 1.567824 BMPR1A

204834_at 1.72139 FGL2

204836_at -1.88285 GLDC

204837_at 1.525623 MTMR9

204844_at 2.637321 ENPEP

204845_s_at 2.887046 ENPEP

204852_s_at 2.019078 PTPN7

204872_at 3.177925 TLE4

204875_s_at 4.729467 GMDS

204879_at 1.580048 PDPN

204881_s_at 2.041952 UGCG

204882_at 1.809863 ARHGAP25

204897_at 18.64047 PTGER4

204904_at 2.349678 GJA4

204905_s_at 1.900478 EEF1E1

204916_at 2.102242 RAMP1

204920_at -1.65233 CPS1

204929_s_at 7.233806 VAMP5

204931_at 22.8869 TCF21

204937_s_at 2.082925 ZNF274

204959_at 3.330781 MNDA

204963_at 1.689471 SSPN

204967_at 1.948553 SHROOM2

204969_s_at 1.641926 RDX

204971_at 2.606981 CSTA

204973_at -2.01118 GJB1

204975_at 2.625145 EMP2

204985_s_at -1.63671 TRAPPC6A

204994_at 1.884029 MX2

204998_s_at -1.50217 ATF5

205003_at 3.516378 DOCK4

205005_s_at 1.607736 NMT2

205016_at -2.03301 TGFA

205042_at 1.872095 GNE

205047_s_at 3.134602 ASNS

205051_s_at -1.74844 KIT

205058_at -1.64 SLC26A1

205066_s_at -1.74064 ENPP1

205073_at -1.53073 CYP2J2

205074_at -2.03124 SLC22A5

205075_at -1.57676 SERPINF2

205078_at 1.700078 PIGF

205081_at 1.803041 CRIP1

205084_at 1.551578 BCAP29

205089_at 1.662759 ZNF7

205092_x_at1.787364 ZBTB1

205093_at -1.51973 PLEKHA6

205094_at 1.620399 PEX12

205097_at 2.858686 SLC26A2

205110_s_at 1.965652 FGF13

205111_s_at 35.38323 PLCE1

205112_at 30.20265 PLCE1

205117_at 21.95451 FGF1

205120_s_at 2.240515 SGCB

205122_at 1.673016 TMEFF1

205126_at 1.802531 VRK2

205129_at -1.70375 NPM3

205137_x_at-1.68533 USH1C

205150_s_at -1.65709 KIAA0644

205159_at 6.251353 CSF2RB

205164_at -1.75322 GCAT

205174_s_at 1.629961 QPCT

205176_s_at 1.747504 ITGB3BP

205177_at 2.541329 TNNI1

205190_at -1.65216 PLS1

205200_at 2.267868 CLEC3B

205202_at 1.525921 PCMT1

205208_at -2.03952 ALDH1L1

205209_at -1.79286 ACVR1B

205225_at -1.96029 ESR1

205227_at 1.589672 IL1RAP

205236_x_at-1.52373 SOD3

205237_at 1.65012 FCN1

205247_at 1.619877 NOTCH4

205250_s_at 1.866206 CEP290

205259_at 2.356891 NR3C2

205260_s_at 1.912064 ACYP1

205267_at 1.973936 POU2AF1

205269_at 2.170864 LCP2

205277_at 1.647492 PRDM2

205278_at -1.72523 GAD1

205288_at 9.582243 CDC14A

205289_at 5.818505 BMP2

205290_s_at 5.042506 BMP2

205292_s_at 1.587301 HNRNPA2B1

205295_at -1.57528 CKMT2

205298_s_at 1.949416 BTN2A2

205301_s_at -1.54746 OGG1

205308_at 1.930636 FAM164A

205313_at -1.65209 HNF1B

205316_at -1.84072

205325_at 2.279843 PHYHIP

205326_at 6.996751 RAMP3

205328_at -1.97775 CLDN10

205343_at -2.17925 SULT1C2

205347_s_at 5.654905 MGC39900 /// TMSB15A

205348_s_at 9.661331 DYNC1I1

205353_s_at -1.7063 PEBP1

205355_at -1.58841 ACADSB

205356_at 1.724258 USP13

205357_s_at 4.463402 AGTR1

205372_at 1.809982 PLAG1

205381_at 1.52391 LRRC17

205384_at 1.906565 FXYD1

205395_s_at 1.506516 MRE11A

205405_at 8.8096 SEMA5A

205407_at 7.678464 RECK

205417_s_at 5.288249 DAG1

205422_s_at 1.984272 ITGBL1

205433_at -2.30571 BCHE

205437_at 2.508926 ZNF211

205442_at -1.59579 MFAP3L

205464_at -1.69321 SCNN1B

205471_s_at 8.089933 DACH1

205472_s_at 7.231263 DACH1

205474_at 1.881522 CRLF3

205477_s_at -1.57743 AMBP

205481_at 2.288655 ADORA1

205483_s_at 2.024253 ISG15

205498_at 3.039837 GHR

205508_at -1.52007 SCN1B

205514_at 2.452798 ZNF415

205518_s_at 5.35241 CMAH

205529_s_at 3.359456 RUNX1T1

205541_s_at 1.686661 GSPT2

205542_at -1.74008 STEAP1

205548_s_at 4.025057 BTG3

205559_s_at 2.074412 PCSK5

205579_at 1.988645 HRH1

205583_s_at 2.444278 ALG13

205584_at 2.12493 ALG13

205588_s_at -1.50222 FGFR1OP

205590_at -2.23405 RASGRP1

205592_at -2.16955 SLC4A1

205604_at -1.67253 HOXD9

205608_s_at -1.94278 ANGPT1

205614_x_at-1.72767 MST1

205617_at -1.65377 PRRG2

205651_x_at3.742065 RAPGEF4

205656_at 1.897204 PCDH17

205659_at 1.612164 HDAC9

205664_at 2.225185 KIN

205668_at 2.258885 LY75

205670_at -1.73521 GAL3ST1

205673_s_at -1.61717 ASB9

205675_at -1.87004 MTTP

205677_s_at -1.70553 DLEU1

205690_s_at 1.600154 BUD31

205715_at 2.431175 BST1

205717_x_at 1.59959 PCDHGA1 /// PCDHGA10 /// PCDHGA11 /// PCDHGA12 /// PCDHGA2 /// PCDHGA3 /// PCDHGA4 /// PCDHGA5 /// PCDHGA6 /// PCDHGA7 /// PCDHGA8 /// PCDHGA9 /// PCDHGB1 /// PCDHGB2 /// PCDHGB3 /// PCDHGB4 /// PCDHGB5 /// PCDHGB6 /// PCDHGB7 /// PCDHGC3 /// PCDHGC4 /// PCDHGC5

205718_at -1.54412 ITGB7

205726_at 1.732228 DIAPH2

205728_at -1.73693

205730_s_at -1.52573 ABLIM3

205738_s_at -1.55126 FABP3

205743_at 1.586675 STAC

205745_x_at1.862457 ADAM17

205750_at -1.67293 BPHL

205751_at -2.10285 SH3GL2

205757_at -1.91633 ENTPD5

205760_s_at -1.62986 OGG1

205770_at -1.57044 GSR

205775_at -1.51774 FAM50B

205776_at -1.7997 FMO5

205777_at -2.07772 DUSP9

205778_at 8.641982 KLK7

205786_s_at 1.551895 ITGAM

205788_s_at 1.738153 ZC3H11A

205801_s_at 4.801177 RASGRP3

205802_at 1.815142 TRPC1

205803_s_at 2.02702 TRPC1

205816_at 4.277656 ITGB8

205841_at 1.511789 JAK2

205843_x_at-1.62558 CRAT

205846_at 2.902414 PTPRB

205848_at 1.777177 GAS2

205856_at 3.002733 SLC14A1

205863_at 1.930761 S100A12

205866_at 5.837317 FCN3

205870_at -1.66663 BDKRB2

205880_at 2.271175 PRKD1

205888_s_at 2.722801 JAKMIP2

205898_at 1.893954 CX3CR1

205904_at 2.109203 MICA

205922_at 1.764906 VNN2

205923_at 1.993264 RELN

205930_at 1.902808 GTF2E1

205939_at -1.6943 CYP3A7

205942_s_at -1.58871 ACSM3

205961_s_at 2.27192 PSIP1

205972_at -1.56941 SLC38A3

205975_s_at 3.291532 HOXD1

205984_at 6.458277 CRHBP

205992_s_at 1.804753 IL15

205997_at 1.724881 ADAM28

206037_at 1.901612 CCBL1

206044_s_at -1.5971 BRAF /// KIAA1549

206052_s_at 2.64693 SLBP

206054_at -2.54164 KNG1

206058_at -1.58219 SLC6A12

206059_at 2.212595 ZNF91

206067_s_at 19.0287 WT1

206068_s_at -1.64158 ACADL

206081_at 1.517608 SLC24A1

206082_at 1.840664 HCP5

206085_s_at -1.57989 CTH

206089_at 2.379396 NELL1

206091_at 1.682364 MATN3

206097_at -1.65797 SLC22A18AS

206123_at -1.53268 LLGL1

206129_s_at -1.52126 ARSB

206136_at -1.54568 FZD5

206149_at -1.58205 CHP2

206158_s_at 1.672225 CNBP

206167_s_at -2.0053 ARHGAP6

206172_at 27.20456 IL13RA2

206204_at -1.59829 GRB14

206208_at -1.72613 CA4

206210_s_at 2.2182 CETP

206226_at -2.18311 HRG

206242_at -1.76043 TM4SF5

206247_at 1.641596 MICB

206254_at -2.06437 EGF

206262_at -1.86607 ADH1C

206271_at 1.626 TLR3

206272_at 2.123745 RAB4A /// SPHAR

206283_s_at 2.653173 TAL1

206286_s_at -2.13359 TDGF1 /// TDGF3

206302_s_at -2.37785 NUDT4 /// NUDT4P1

206303_s_at -1.91699 NUDT4 /// NUDT4P1

206306_at 2.662931 RYR3

206307_s_at 3.260182 FOXD1

206325_at -1.86969 SERPINA6

206332_s_at 3.740373 IFI16

206336_at 1.572478 CXCL6

206340_at -1.68518 NR1H4

206343_s_at -1.62538 NRG1

206346_at -2.0914 PRLR

206348_s_at -1.62315 PDK3

206371_at -1.74083 FOLR3

206410_at -1.59093 NR0B2

206440_at -1.56927 LIN7A

206453_s_at 2.672074 NDRG2

206481_s_at 6.542758 LDB2

206504_at -1.80729 CYP24A1

206510_at 1.643346 SIX2

206517_at -1.92178 CDH16

206527_at -1.5135 ABAT

206528_at 3.436081 TRPC6

206558_at -1.93149 SIM2

206567_s_at 1.553119 PHF20

206580_s_at 2.412195 EFEMP2

206584_at 2.208178 LY96

206610_s_at -2.06501 F11

206672_at -2.20229 AQP2

206674_at -1.78771 FLT3

206702_at 3.245919 TEK

206704_at -1.59824 CLCN5

206707_x_at1.691626 FAM65B

206709_x_at-1.65576 GPT

206713_at 4.600814 NTNG1

206755_at -1.92431 CYP2B6

206799_at -2.22383 SCGB1D2

206821_x_at-1.50115 AGFG2

206825_at 1.790424 OXTR

206833_s_at 2.031091 ACYP2

206853_s_at 1.580903 MAP3K7

206855_s_at 1.837414 HYAL2

206857_s_at 3.261691 FKBP1B

206874_s_at 4.902026

206875_s_at 5.221699 SLK

206876_at -2.22409 SIM1

206896_s_at -1.62113 GNG7

206928_at 2.887245 ZNF124

206954_at 3.406513 WIT1

206955_at -1.56936 AQP7

206957_at -1.8769 AGXT

206958_s_at 1.875056 UPF3A

206964_at -2.08262 NAT8B

206978_at 1.527139 CCR2 /// FLJ78302

207007_at -1.76256 NR1I3

207016_s_at 2.572643 ALDH1A2

207022_s_at -1.62734 LDHC

207057_at -2.93445 SLC16A7

207069_s_at 7.849559 SMAD6

207071_s_at -1.57852 ACO1

207081_s_at 1.761875 PI4KA

207122_x_at1.707548 SULT1A2

207129_at -1.51783 CA5B

207148_x_at4.274654 MYOZ2

207177_at -1.71062 PTGFR

207178_s_at -1.67398 FRK

207184_at -1.6431 SLC6A13

207186_s_at 2.538971 BPTF

207233_s_at -1.70035 MITF

207243_s_at 1.752299 CALM1 /// CALM2 /// CALM3

207254_at -1.87828 SLC15A1

207264_at 1.940732 KDELR3

207266_x_at3.885851 RBMS1

207279_s_at 3.162712 NEBL

207358_x_at1.611904 MACF1

207378_at -1.71154 TREH

207386_at -1.64515 CYP7B1

207414_s_at 2.777827 PCSK6

207415_at 17.4939 PLA2R1

207429_at -2.56074 SLC22A2

207434_s_at -1.8013 FXYD2

207467_x_at1.801456 CAST

207469_s_at 2.111962 PIR

207480_s_at 5.013607 MEIS2

207483_s_at 2.445505 CAND1

207510_at -1.549 BDKRB1

207513_s_at 1.572053 ZNF189

207526_s_at 5.578737 IL1RL1

207543_s_at -1.6899 P4HA1

207544_s_at -1.84536 ADH6

207554_x_at 2.38351 TBXA2R

207560_at -1.67165 SLC28A1

207650_x_at -2.0859 PTGER1

207655_s_at -2.08517 BLNK

207668_x_at1.637025 PDIA6

207673_at 13.01297 NPHS1

207702_s_at 3.939491 MAGI2

207705_s_at -1.99922 RP4-691N24.1

207719_x_at 1.60688 CEP170

207749_s_at -1.62965 PPP2R3A

207752_x_at-1.56269 PRB1 /// PRB2

207753_at 1.536692 ZNF304

207771_at -1.92991 SLC5A2

207776_s_at 1.787149 CACNB2

207789_s_at 13.73047 DPP6

207826_s_at 3.884435 ID3

207827_x_at1.821985 SNCA

207839_s_at 1.534778 C9orf127

207842_s_at 1.966516 CASC3

207845_s_at 2.551891 ANAPC10

207855_s_at 1.867805 CLCC1

207876_s_at 1.542082 FLNC

207950_s_at -1.82256 ANK3

207956_x_at1.562015 PDS5B

207974_s_at 2.004425 SKP1

207980_s_at 2.039296 CITED2

207981_s_at -1.73703 ESRRG

208012_x_at1.911207 SP110

208021_s_at 2.535208 RFC1

208034_s_at -1.8613 PROZ

208051_s_at -1.81776 PAIP1

208066_s_at 1.781094 GTF2B

208091_s_at 1.974828 ECOP

208095_s_at 1.538171 SRP72

208121_s_at 43.68876 PTPRO

208127_s_at 1.805281 SOCS5

208165_s_at 1.644692 PRSS16

208240_s_at 6.055281 FGF1

208306_x_at1.947745 HLA-DRB1

208367_x_at -1.615 CYP3A4

208369_s_at -1.57346 GCDH

208370_s_at 1.677488 RCAN1

208398_s_at 2.465541 TBPL1

208407_s_at 2.418451 CTNND1

208415_x_at2.337328 ING1

208436_s_at 1.696828 IRF7

208438_s_at 1.668347 FGR

208454_s_at 1.641581 PGCP

208611_s_at 4.008497 SPTAN1

208629_s_at -1.76033 HADHA

208633_s_at 1.65896 MACF1

208634_s_at 2.543989 MACF1

208638_at 1.560679 PDIA6

208639_x_at1.616379 PDIA6

208640_at 1.798013 RAC1

208641_s_at 1.631025 RAC1

208650_s_at -1.92908 CD24

208656_s_at 1.601733 CCNI

208669_s_at 2.116482 EID1

208671_at 3.570547 SERINC1

208683_at 4.922081 CAPN2

208690_s_at 1.57329 PDLIM1

208698_s_at -1.83257 NONO

208723_at 2.436001 USP11

208729_x_at2.090997 HLA-B

208730_x_at-1.52031 RAB2A

208743_s_at 1.899382 YWHAB

208747_s_at 4.456218 C1S

208752_x_at1.511946 NAP1L1

208754_s_at 2.068794 NAP1L1

208755_x_at1.581821 H3F3A /// H3F3B /// LOC440926

208759_at 1.559957 NCSTN

208760_at 1.960709 UBE2I

208763_s_at 2.376422 TSC22D3

208766_s_at 1.735698 HNRNPR

208775_at 1.932853 XPO1

208776_at 2.466264 PSMD11

208782_at 6.374342 FSTL1

208783_s_at 2.434795 CD46

208786_s_at 1.88259 MAP1LC3B

208788_at 1.8175 ELOVL5

208789_at 2.230153 PTRF

208802_at 1.921688 SRP72

208806_at 1.65119 CHD3

208812_x_at2.704443 HLA-C

208816_x_at6.068558 ANXA2P2

208817_at 2.20151 COMT

208818_s_at 2.212973 COMT

208820_at 1.677853 PTK2

208829_at 1.828039 TAPBP

208833_s_at 1.57007 ATXN10

208837_at 2.099303 TMED3

208839_s_at 1.51335 CAND1

208850_s_at -2.3799 THY1

208852_s_at 1.998633 CANX

208857_s_at 1.808626 PCMT1

208858_s_at 2.68689 FAM62A

208873_s_at 1.556617 REEP5

208890_s_at 1.715229 PLXNB2

208894_at 2.248 HLA-DRA

208908_s_at 1.796527 CAST

208918_s_at -1.66243 NADK

208920_at 1.716894 SRI

208923_at 1.688776 CYFIP1

208924_at 2.357903 RNF11

208933_s_at 9.558291 LGALS8

208934_s_at 5.617196 LGALS8

208935_s_at 7.191899 LGALS8

208936_x_at6.110809 LGALS8

208937_s_at 3.050163 ID1

208944_at 7.935742 TGFBR2

208958_at 3.361667 TXNDC4

208959_s_at 1.786641 TXNDC4

208964_s_at 1.616319 FADS1

208965_s_at 1.623619 IFI16

208966_x_at4.540469 IFI16

208978_at 2.403794 CRIP2

208980_s_at 1.953325 RPS27A /// UBB /// UBC

208981_at 3.745717 PECAM1

208982_at 3.23174 PECAM1

208983_s_at 1.51417 PECAM1

208984_x_at1.990118 RBM10

208990_s_at 2.035771 HNRNPH3

208993_s_at 1.606612 PPIG

208999_at 1.660954 8-Sep

209003_at -1.68569 SLC25A11

209007_s_at 1.678891 C1orf63

209015_s_at 1.549669 DNAJB6

209027_s_at 1.659014 ABI1

209028_s_at 2.052417 ABI1

209031_at -1.62006 CADM1

209040_s_at 2.664085 PSMB8

209042_s_at 1.63867 UBE2G2

209043_at 2.657444 PAPSS1

209046_s_at 1.532083 GABARAPL2

209048_s_at 2.038216 ZMYND8

209049_s_at 1.781079 ZMYND8

209056_s_at 1.533107 CDC5L

209063_x_at 1.69794 PAIP1

209064_x_at-1.74092 PAIP1

209068_at 1.521809 HNRPDL

209079_x_at1.779518 PCDHGA1 /// PCDHGA10 /// PCDHGA11 /// PCDHGA12 /// PCDHGA2 /// PCDHGA3 /// PCDHGA4 /// PCDHGA5 /// PCDHGA6 /// PCDHGA7 /// PCDHGA8 /// PCDHGA9 /// PCDHGB1 /// PCDHGB2 /// PCDHGB3 /// PCDHGB4 /// PCDHGB5 /// PCDHGB6 /// PCDHGB7 /// PCDHGC3 /// PCDHGC4 /// PCDHGC5

209084_s_at 2.005896 RAB28

209085_x_at1.671129 RFC1

209089_at 1.579309 RAB5A

209090_s_at 2.815998 SH3GLB1

209091_s_at 1.631324 SH3GLB1

209101_at 13.9902 CTGF

209103_s_at 1.5428 UFD1L

209106_at 2.225068 NCOA1

209107_x_at1.866416 NCOA1

209112_at 3.799161 CDKN1B

209114_at -2.03962 TSPAN1

209118_s_at 2.130382 TUBA1A

209139_s_at 1.689966 PRKRA

209140_x_at3.137689 HLA-B /// MICA

209147_s_at 5.163881 PPAP2A

209149_s_at 1.81903 TM9SF1

209170_s_at 2.497138 GPM6B

209187_at 1.962698 DR1

209191_at 4.358303 TUBB6

209193_at -1.70737 PIM1

209199_s_at 1.670978 MEF2C

209200_at 2.166513 MEF2C

209209_s_at 1.62696 FERMT2

209210_s_at 2.844822 FERMT2

209211_at -1.62713 KLF5

209218_at 3.06708 SQLE

209219_at 1.795674 RDBP

209227_at 4.051572 TUSC3

209228_x_at3.197072 TUSC3

209230_s_at 1.848429 NUPR1

209235_at -1.50087 CLCN7

209254_at -1.57856 KLHDC10

209259_s_at 1.880269 SMC3

209263_x_at2.094398 TSPAN4

209265_s_at 1.85827 METTL3

209268_at 1.897713 VPS45

209272_at 2.040496 NAB1

209278_s_at 2.895031 TFPI2

209285_s_at 1.797262 C3orf63

209286_at 19.43708 CDC42EP3

209287_s_at 1.643684 CDC42EP3

209288_s_at 16.34968 CDC42EP3

209289_at -1.64408 NFIB

209292_at 3.594777 ID4

209306_s_at 2.227874 SWAP70

209307_at 2.888403 SWAP70

209308_s_at 2.589465 BNIP2

209310_s_at 2.560893 CASP4

209311_at 2.758641 BCL2L2

209312_x_at2.317089 HLA-DRB1 /// HLA-DRB2 /// HLA-DRB3 /// HLA-DRB4 /// HLA-DRB5 /// LOC100133484 /// LOC100133661 /// LOC100133811 /// LOC730415 /// RNASE2 /// ZNF749

209335_at 9.787894 DCN

209337_at 3.107606 PSIP1

209341_s_at 1.938046 IKBKB

209344_at 1.619044 TPM4

209355_s_at 3.963932 PPAP2B

209356_x_at 2.17431 EFEMP2

209357_at 3.596831 CITED2

209362_at 2.594101 MED21

209363_s_at 1.571076 MED21

209365_s_at 3.424479 ECM1

209370_s_at -1.59503 SH3BP2

209373_at -1.66085 MALL

209379_s_at 2.534777 KIAA1128

209380_s_at -1.64701 ABCC5

209386_at 4.043748 TM4SF1

209387_s_at 2.016273 TM4SF1

209394_at 1.763647 ASMTL

209395_at 59.00403 CHI3L1

209396_s_at 40.66776 CHI3L1

209412_at 1.929459 TRAPPC10

209422_at 2.205606 PHF20

209426_s_at -1.6311 AMACR

209436_at -1.7098 SPON1

209441_at 1.68957 RHOBTB2

209442_x_at -1.6458 ANK3

209443_at -1.78773 SERPINA5

209447_at 2.541283 SYNE1

209448_at 1.705251 HTATIP2

209462_at 1.680963 APLP1

209471_s_at 1.922192 FNTA

209486_at 1.776459 UTP3

209487_at 1.621751 RBPMS

209488_s_at 2.654132 RBPMS

209496_at 2.968198 RARRES2

209500_x_at-1.51997 TNFSF12 /// TNFSF12-TNFSF13 /// TNFSF13

209501_at 1.733882 CDR2

209504_s_at 1.566358 PLEKHB1

209522_s_at -1.62602 CRAT

209524_at 2.452614 HDGFRP3

209526_s_at 1.560985 HDGFRP3

209531_at -1.54969 GSTZ1

209535_s_at 2.779528

209536_s_at 2.370554 EHD4

209539_at 2.289222 ARHGEF6

209540_at 6.052118 IGF1

209541_at 9.759318 IGF1

209546_s_at 2.774266 APOL1

209550_at 6.573459 NDN

209553_at 1.604954 VPS8

209572_s_at 1.7346 EED

209575_at 3.253725 IL10RB

209578_s_at 1.504375 POFUT2

209580_s_at 2.18478 MBD4

209582_s_at 1.76992 CD200

209583_s_at 10.11304 CD200

209590_at 4.945486 BMP7

209591_s_at 3.666405 BMP7

209593_s_at 1.923536 TOR1B

209596_at -1.74536 MXRA5

209598_at 16.34981 PNMA2

209600_s_at -1.82289 ACOX1

209604_s_at -1.5114 GATA3

209607_x_at2.065619 SULT1A3 /// SULT1A4

209613_s_at -2.39879 ADH1B

209635_at -1.56098 AP1S1

209645_s_at -1.74548 ALDH1B1

209646_x_at-1.70869 ALDH1B1

209647_s_at 1.635301 SOCS5

209648_x_at1.783763 SOCS5

209651_at 2.961109 TGFB1I1

209654_at 1.56978 KIAA0947

209655_s_at 1.626839 TMEM47

209656_s_at 2.643053 TMEM47

209662_at 3.124113 CETN3

209678_s_at 2.494531 PRKCI

209681_at -1.84137 SLC19A2

209682_at 5.255908 CBLB

209685_s_at 1.595542 PRKCB

209691_s_at -1.51387 DOK4

209699_x_at-1.78955 AKR1C2

209700_x_at1.579694 PDE4DIP

209707_at 1.536192 PIGK

209712_at -1.51546 SLC35D1

209717_at 2.050715 EVI5

209723_at 4.944546 SERPINB9

209732_at 3.745549 CLEC2B

209733_at 1.983059 LOC286440

209735_at -1.80755 ABCG2

209737_at 14.2094 MAGI2

209739_s_at -1.53292 PNPLA4

209741_x_at2.231451 SCAPER

209759_s_at -1.58829 DCI

209762_x_at 2.09751 SP110

209763_at 1.803196 CHRDL1

209768_s_at -1.51946 GP1BB /// SEPT5

209770_at 1.763269 BTN3A1

209780_at 1.742419 PHTF2

209785_s_at 2.873483 PLA2G4C

209786_at 2.460232 HMGN4

209789_at 8.911611 CORO2B

209791_at -1.70529 PADI2

209795_at 1.943655 CD69

209806_at 8.380208 HIST1H2BK

209814_at 1.766328 ZNF330

209815_at 1.789442 PTCH1

209829_at 3.526223 FAM65B

209846_s_at 1.971793 BTN3A2

209850_s_at 2.202215 CDC42EP2

209858_x_at 1.610134 MPPE1

209861_s_at 1.845014 METAP2

209868_s_at 4.564276 RBMS1

209883_at 5.115286 GLT25D2

209884_s_at -1.51835 SLC4A7

209890_at 2.301366 TSPAN5

209894_at 5.525075 LEPR

209897_s_at -1.60184 SLIT2

209900_s_at -1.62419 SLC16A1

209901_x_at11.70452 AIF1

209904_at 2.682794 TNNC1

209905_at 1.617183 HOXA9

209920_at 1.857532 BMPR2

209946_at 2.125557 VEGFC

209950_s_at 4.675273 VILL

209960_at -1.98991 HGF

209966_x_at-2.75718 ESRRG

209969_s_at 3.628952 STAT1

209979_at -1.5047 ADARB1

209982_s_at -1.54986 NRXN2

209984_at 1.551912 JMJD2C

209989_at 1.513876 ZNF268

210017_at 1.577956 MALT1

210020_x_at-1.83426 CALML3

210028_s_at 1.688206 ORC3L

210036_s_at 1.618616 KCNH2

210038_at -1.78702 PRKCQ

210045_at -2.16462 IDH2

210046_s_at -1.77047 IDH2

210051_at 2.871661 RAPGEF3

210054_at 1.545824 C4orf15

210058_at -1.68051 MAPK13

210059_s_at -1.53834 MAPK13

210074_at 2.504417 CTSL2

210095_s_at -1.9504 IGFBP3

210096_at 1.931811 CYP4B1

210105_s_at 3.631044 FYN

210106_at -1.52212 RDH5

210108_at -1.6675 CACNA1D

210119_at -1.553 KCNJ15

210121_at 12.97949 B3GALT2

210124_x_at1.572811 SEMA4F

210131_x_at-1.67875 SDHC

210137_s_at 2.054871 DCTD

210139_s_at 1.579854 PMP22

210150_s_at 1.942699 LAMA5

210156_s_at 1.67822 PCMT1

210177_at -1.53482 TRIM15

210194_at 7.660315 PLA2R1

210205_at 1.778667 B3GALT4

210218_s_at 2.115352 SP100

210220_at 13.85869 FZD2

210227_at -1.64953 DLGAP2

210249_s_at 1.756685 NCOA1

210264_at -1.51428 GPR35

210266_s_at 1.514165 TRIM33

210276_s_at 3.021915 TRIOBP

210277_at 1.812865 AP4S1

210283_x_at1.746932 PAIP1

210299_s_at 2.851092 FHL1

210306_at 1.511074 L3MBTL

210314_x_at-1.55175 TNFSF13

210326_at -1.50082 AGXT

210374_x_at-2.32682 PTGER3

210375_at -2.58638 PTGER3

210385_s_at 1.601498 ERAP1

210397_at -1.73472 DEFB1

210399_x_at-1.90674 FUT6

210402_at -2.96276 KCNJ1

210403_s_at -1.59672 KCNJ1

210408_s_at -1.60687 CPNE6

210427_x_at9.888495 ANXA2

210451_at -1.75926 PKLR

210461_s_at -1.89637 ABLIM1

210470_x_at-1.82345 NONO

210473_s_at 1.537133 GPR125

210476_s_at -1.50637 PRLR

210512_s_at 3.738869 VEGFA

210513_s_at 4.348336 VEGFA

210515_at -1.51763 HNF1A

210519_s_at 7.836102 NQO1

210544_s_at -2.27306 ALDH3A2

210555_s_at 1.718118 NFATC3

210571_s_at 1.564715 CMAH

210577_at -1.5784 CASR

210580_x_at1.757533 SULT1A3 /// SULT1A4

210582_s_at 1.849606 LIMK2

210596_at 1.670558 LOC100129513

210609_s_at -1.86575 TP53I3

210612_s_at 2.477254 SYNJ2

210619_s_at -2.05272 HYAL1

210621_s_at 1.907024 RASA1

210640_s_at -1.86494 GPER

210674_s_at 4.324675 PCDHA1 /// PCDHA10 /// PCDHA11 /// PCDHA12 /// PCDHA13 /// PCDHA2 /// PCDHA3 /// PCDHA4 /// PCDHA5 /// PCDHA6 /// PCDHA7 /// PCDHA8 /// PCDHA9 /// PCDHAC1 /// PCDHAC2

210705_s_at 1.525035 TRIM5

210731_s_at 3.432922 LGALS8

210735_s_at -2.24406 CA12

210739_x_at-3.40111 SLC4A4

210740_s_at -1.61398 ITPK1

210762_s_at 5.887934 DLC1

210778_s_at 1.86677 MXD4

210807_s_at -1.53298 SLC16A7

210809_s_at 19.8582 POSTN

210827_s_at -1.61428 ELF3

210829_s_at 1.561638 SSBP2

210830_s_at 5.075756 PON2

210831_s_at -1.94264 PTGER3

210832_x_at-2.70253 PTGER3

210844_x_at 1.8834 CTNNA1

210849_s_at 1.527107 VPS41

210854_x_at-1.90312 SLC6A8

210861_s_at 3.496491 WISP3

210873_x_at1.544921 APOBEC3A

210879_s_at -1.74974 RAB11FIP5

210942_s_at 14.07722 ST3GAL6

210946_at 3.472863 PPAP2A

210959_s_at -1.72249 SRD5A1

210982_s_at 1.993845 HLA-DRA

210986_s_at 1.69897 TPM1

210987_x_at2.173967 TPM1

210993_s_at 1.976475 SMAD1

211056_s_at -1.5576 SRD5A1

211063_s_at 1.606663 NCK1

211066_x_at1.936983 PCDHGA1 /// PCDHGA10 /// PCDHGA11 /// PCDHGA12 /// PCDHGA2 /// PCDHGA3 /// PCDHGA4 /// PCDHGA5 /// PCDHGA6 /// PCDHGA7 /// PCDHGA8 /// PCDHGA9 /// PCDHGB1 /// PCDHGB2 /// PCDHGB3 /// PCDHGB4 /// PCDHGB5 /// PCDHGB6 /// PCDHGB7 /// PCDHGC3 /// PCDHGC4 /// PCDHGC5

211075_s_at 3.159608 CD47

211105_s_at 3.593236 NFATC1

211161_s_at 4.548645 COL3A1

211184_s_at -1.75468 USH1C

211185_s_at 1.665322 SF3B1

211231_x_at-1.58684 CYP4A11

211256_x_at2.369539 BTN2A1

211257_x_at1.572046 ZNF638

211275_s_at 2.148142 GYG1

211276_at 5.824264 TCEAL2

211296_x_at1.742079 RPS27A /// UBB /// UBC

211368_s_at 2.016812 CASP1

211373_s_at 1.523547 PSEN2

211379_x_at1.795561 B3GALNT1

211382_s_at 2.916637 TACC2

211385_x_at2.081062 SULT1A2

211416_x_at-1.78667 GGTLC1

211432_s_at 4.541381 TYRO3

211465_x_at-1.82013 FUT6

211470_s_at -1.54143 SULT1C2

211494_s_at -3.72009 SLC4A4

211527_x_at3.413848 VEGFA

211528_x_at1.748976 HLA-G

211529_x_at1.924124 HLA-G

211535_s_at 1.523946 FGFR1

211538_s_at 2.732793 HSPA2

211546_x_at1.852649 SNCA

211548_s_at 4.002874 HPGD

211552_s_at -1.78409 ALDH4A1

211563_s_at 1.62927 C19orf2

211576_s_at -1.59097 SLC19A1

211596_s_at 1.630286 LRIG1

211597_s_at 1.981274 HOPX

211626_x_at1.619651 ERG

211630_s_at -1.55138 GSS

211663_x_at20.72765 PTGDS

211671_s_at 2.465303 NR3C1

211675_s_at 6.222273 MDFIC

211689_s_at -1.6622 TMPRSS2

211698_at 1.589895 EID1

211703_s_at 2.003594 TM2D1

211712_s_at -1.51042 ANXA9

211715_s_at -1.65789 BDH1

211726_s_at -1.8959 FMO2

211729_x_at 1.55909 BLVRA

211742_s_at 1.805852 EVI2B

211748_x_at21.53524 PTGDS

211758_x_at 1.70688 TXNDC9

211759_x_at1.617911 TBCB

211760_s_at 1.971546 VAMP4

211769_x_at2.205856 SERINC3

211778_s_at -1.603 OVOL2

211784_s_at 1.555874 SFRS1

211799_x_at1.597296 HLA-C

211813_x_at 7.78846 DCN

211843_x_at-1.56082 CYP3A7

211858_x_at1.913665 GNAS

211864_s_at 2.142735 MYOF

211896_s_at 18.83431 DCN

211909_x_at-1.54128 PTGER3

211911_x_at2.761169 HLA-B

211926_s_at 4.173716 MYH9

211929_at 1.879194 HNRNPA3

211936_at 2.138955 HSPA5

211940_x_at2.044357 H3F3A /// H3F3B /// LOC440926

211945_s_at 2.132703 ITGB1

211948_x_at1.505518 BAT2D1

211951_at 1.575782 NOLC1

211959_at 2.456877 IGFBP5

211963_s_at 2.360828 ARPC5

211964_at 2.474765 COL4A2

211974_x_at1.539678 RBPJ

211979_at 1.659096 GPR107

211980_at 2.541827 COL4A1

211981_at 2.201329 COL4A1

211983_x_at 1.60596 ACTG1

211986_at 2.669684 AHNAK

211988_at 1.741324 SMARCE1

211989_at 1.508418 SMARCE1

211990_at 3.178619 HLA-DPA1

211991_s_at 3.084258 HLA-DPA1

211995_x_at2.115496 ACTG1

211997_x_at1.507127 H3F3A /// H3F3B /// LOC440926

211998_at 2.217146 H3F3A /// H3F3B /// LOC440926

212010_s_at 1.570738 CDV3

212012_at 3.514033 PXDN

212013_at 2.018929 PXDN

212036_s_at 1.950148 PNN

212038_s_at -2.2375 VDAC1

212055_at 2.105313 C18orf10

212058_at 1.509238 SR140

212060_at 1.553769 SR140

212062_at 3.87832 ATP9A

212063_at 1.717966 CD44

212067_s_at 4.198729 C1R

212071_s_at 1.549138 SPTBN1

212074_at 2.091485 UNC84A

212077_at 1.819774 CALD1

212090_at -1.53618 GRINA

212097_at 2.118853 CAV1

212098_at 10.36681 LOC151162

212103_at 1.820527 KPNA6

212104_s_at 1.533638 RBM9

212117_at 2.230434 RHOQ

212120_at 2.324514 RHOQ

212121_at 2.011324 TCTN3

212122_at 2.458925 RHOQ

212124_at 1.673436 ZMIZ1

212131_at 1.593965 LSM14A

212136_at 1.585706 ATP2B4

212143_s_at -1.5038 IGFBP3

212154_at 2.093948 SDC2

212157_at 1.884337 SDC2

212158_at 3.082796 SDC2

212160_at 1.783675 XPOT

212163_at 2.18371 KIDINS220

212165_at -1.51319 TMEM183A /// TMEM183B

212169_at 2.425363 FKBP9

212171_x_at3.399015 VEGFA

212180_at 1.85154 CRKL

212181_s_at -1.83661 NUDT4 /// NUDT4P1

212183_at -1.86943 NUDT4 /// NUDT4P1

212187_x_at26.21726 PTGDS

212190_at -2.25662 SERPINE2

212192_at 2.282615 KCTD12

212195_at 2.026842 IL6ST

212197_x_at 1.53727 MPRIP

212203_x_at3.547405 IFITM3

212204_at 1.771907 TMEM87A

212205_at 1.99238 H2AFV

212215_at 1.536642 PREPL

212221_x_at1.533866 IDS

212226_s_at 2.649565 PPAP2B

212230_at 4.726562 PPAP2B

212231_at 1.762905 FBXO21

212232_at 1.809148 FNBP4

212233_at 11.76403 MAP1B

212235_at 2.41694 PLXND1

212244_at 1.624434 GCOM1 /// GRINL1A

212245_at 1.759422 MCFD2

212248_at 1.737156 MTDH

212254_s_at 3.03522 DST

212256_at 1.599968 GALNT10

212262_at 2.478986 QKI

212268_at 2.499198 SERPINB1

212273_x_at2.099269 GNAS

212274_at 1.798238 LPIN1

212276_at 2.83202 LPIN1

212279_at -1.68975 TMEM97

212281_s_at -1.80459 TMEM97

212282_at -1.64995 TMEM97

212285_s_at 1.594015 AGRN

212288_at 6.038714 FNBP1

212289_at 1.715744 ANKRD12

212298_at 2.086201 NRP1

212306_at 1.593319 CLASP2

212308_at 1.954474 CLASP2

212321_at 1.766876 SGPL1

212326_at 1.734622 VPS13D

212327_at 1.577479 LIMCH1

212333_at 2.691632 FAM98A

212336_at -1.54066 EPB41L1

212338_at 5.149969 MYO1D

212344_at 6.045647 SULF1

212345_s_at 2.695475 CREB3L2

212352_s_at 2.154666 TMED10

212353_at 33.30657 SULF1

212354_at 16.38567 SULF1

212357_at 1.833481 FAM168A

212358_at 4.171413 CLIP3

212361_s_at 2.487547 ATP2A2

212363_x_at1.893772 ACTG1

212364_at 7.597161 MYO1B

212365_at 3.658105 MYO1B

212367_at 1.763645 FEM1B

212371_at 1.896851 FAM152A

212373_at 1.609957 FEM1B

212377_s_at 3.518974 NOTCH2

212387_at 1.913434 TCF4

212390_at 6.421035 LOC727893 /// PDE4DIP

212397_at 2.483015 RDX

212399_s_at 2.441402 VGLL4

212402_at 1.593624 ZC3H13

212406_s_at 3.554211 PCMTD2

212408_at 1.612324 TOR1AIP1

212409_s_at 1.999257 TOR1AIP1

212412_at 2.691444 PDLIM5

212415_at -1.67765 SEPT6

212418_at 2.281133 ELF1

212419_at 2.395606 ZCCHC24

212423_at 2.004569 ZCCHC24

212425_at 1.501593 SCAMP1

212427_at 2.588237 KIAA0368

212428_at 1.69317 KIAA0368

212441_at 1.722885 KIAA0232

212442_s_at 3.901325 LASS6

212444_at 5.487399

212445_s_at -1.60699 NEDD4L

212446_s_at 8.156449 LASS6

212447_at 1.779193 KBTBD2

212453_at 1.918677 KIAA1279

212457_at 1.800802 TFE3

212458_at 2.118016 SPRED2

212463_at 1.598626 CD59

212472_at 2.1156 MICAL2

212473_s_at 6.691398 MICAL2

212476_at 1.895817 ACAP2

212480_at 1.627463 CYTSA

212483_at 1.606468 NIPBL

212485_at 1.69181 GPATCH8

212486_s_at 9.565729 FYN

212491_s_at 1.532331 DNAJC8

212494_at 3.411666 TENC1

212500_at 1.514433 ADO

212501_at 1.653833 CEBPB

212507_at 1.915291 TMEM131

212509_s_at 2.924306 MXRA7

212511_at 1.551124 PICALM

212517_at 2.136933 ATRN

212519_at 1.984914 UBE2E1

212529_at -1.55105 LSM12

212530_at 3.555346 NEK7

212535_at 1.815289 MEF2A

212538_at 2.845748 DOCK9

212542_s_at 3.392036 PHIP

212543_at -1.96156 AIM1

212554_at 2.183574 CAP2

212558_at 2.352164 SPRY1

212564_at 1.541101 KCTD2

212565_at 1.505657 STK38L

212566_at 2.063842 MAP4

212567_s_at 1.540832 MAP4

212569_at 1.777137 SMCHD1

212573_at 2.010467 ENDOD1

212579_at 1.885996 SMCHD1

212580_at 1.56156 ERAP1

212586_at 3.212405 CAST

212587_s_at 1.5025 PTPRC

212588_at 4.051736 PTPRC

212596_s_at 1.678194 HMGXB4

212597_s_at 1.818969 HMGXB4

212605_s_at 1.860524

212607_at 1.719134 AKT3

212609_s_at 4.152465 AKT3

212610_at 1.828342 PTPN11

212613_at 1.614737 BTN3A2

212621_at 1.787947 TMEM194A

212624_s_at 4.891 CHN1

212632_at 2.060151 STX7

212635_at 2.451025 TNPO1

212636_at 5.842879 QKI

212637_s_at 2.368864 WWP1

212638_s_at 1.679794 WWP1

212641_at 2.278471 HIVEP2

212642_s_at 2.632111 HIVEP2

212646_at 2.272811 RFTN1

212647_at 7.469854 RRAS

212653_s_at 1.741298 EHBP1

212655_at 1.973475 ZCCHC14

212656_at -1.58644 TSFM

212667_at 12.6417 SPARC

212673_at 1.954082 METAP1

212674_s_at 1.554442 DHX30

212675_s_at 2.348097 CEP68

212677_s_at 2.471602 CEP68

212681_at -1.64939 EPB41L3

212687_at 1.59162 LIMS1

212689_s_at 1.644281 JMJD1A

212690_at 1.981929 DDHD2

212698_s_at 2.350631 10-Sep

212699_at -1.58055 SCAMP5

212701_at -1.70872 TLN2

212703_at -1.70817 TLN2

212706_at 1.62244 LOC100132214 /// LOC100133005 /// LOC100134722 /// RASA4

212708_at 1.607417 MSL1

212719_at 1.589172 PHLPP

212725_s_at 2.224704 TUG1

212726_at 1.51075 PHF2

212730_at 1.681047 SYNM

212733_at 1.600941 KIAA0226

212738_at 10.14986 ARHGAP19

212740_at 1.840737 PIK3R4

212747_at 2.492915 ANKS1A

212749_s_at 2.252342 RCHY1

212756_s_at 1.52723 UBR2

212758_s_at 3.312295 ZEB1

212760_at 1.545317 UBR2

212764_at 5.81774 ZEB1

212765_at 3.187193 CAMSAP1L1

212769_at -1.52045 TLE3

212771_at -2.09782 FAM171A1

212785_s_at 1.943318 LARP7

212786_at 1.848486 CLEC16A

212787_at 1.543675 YLPM1

212791_at 1.944912 C1orf216

212792_at 1.798633 DPY19L1

212793_at 2.125323 DAAM2

212796_s_at 2.255658 TBC1D2B

212798_s_at 2.429235 ANKMY2

212807_s_at 1.823622 SORT1

212812_at 6.111926

212813_at 5.902796 JAM3 /// LOC100133502

212817_at -1.70015 DNAJB5

212818_s_at 1.651927 ASB1

212822_at 2.137098 HEG1

212825_at 1.504047 PAXIP1

212828_at 8.474185 SYNJ2

212830_at 4.124934 MEGF9

212843_at 2.45364 NCAM1

212845_at 1.922368 SAMD4A

212848_s_at 2.105626 C9orf3

212873_at 1.995665 HMHA1

212877_at 1.518606 KLC1

212878_s_at 3.429387 KLC1

212882_at 1.503843 KLHL18

212885_at 1.593162 MPHOSPH10

212890_at 1.518892 SLC38A10

212893_at 1.521375 ZZZ3

212894_at -1.51259 SUPV3L1

212895_s_at 1.724725 ABR

212906_at -1.61702 GRAMD1B

212911_at -1.64897 DNAJC16

212912_at 2.20783 RPS6KA2

212913_at 2.161064 C6orf26 /// MSH5

212914_at 2.570211 CBX7

212915_at -1.60927 PDZRN3

212918_at 2.152563 RECQL

212919_at 2.010792 DCP2

212922_s_at 1.760609 SMYD2

212928_at 1.932377 TSPYL4

212950_at 2.165357 GPR116

212956_at 1.641846 TBC1D9

212958_x_at2.323563 PAM

212959_s_at 3.757205 GNPTAB

212967_x_at1.540968 NAP1L1

212970_at 3.565053 APBB2

212972_x_at1.537075 APBB2

212979_s_at 2.249684 FAM115A

212981_s_at 2.831154 FAM115A

212982_at 1.745867 ZDHHC17

212985_at 4.719815 APBB2

212988_x_at1.565143 ACTG1

212989_at 2.497175 SGMS1

212991_at 3.296196 FBXO9

212993_at 2.328059 NACC2

212998_x_at2.05782 HLA-DQB1

213002_at -1.54404 MARCKS

213005_s_at 2.695102 KANK1

213011_s_at -1.70044 TPI1

213017_at 1.747379 ABHD3

213027_at 1.773321 TROVE2

213032_at -2.92774 NFIB

213034_at 1.960668 KIAA0999

213035_at 2.175458 ANKRD28

213039_at 1.918745 ARHGEF18

213044_at 2.350027 ROCK1

213063_at 1.850926 ZC3H14

213068_at -1.57218 DPT

213069_at 3.748897 HEG1

213070_at 1.543405 PIK3C2A

213075_at 4.063407 OLFML2A

213085_s_at -1.5948 WWC1

213086_s_at 1.683148 CSNK1A1

213095_x_at9.794753 AIF1

213102_at 2.003648 ACTR3

213103_at 1.615552 STARD13

213110_s_at 5.179849 COL4A5

213122_at 2.65998 TSPYL5

213123_at 1.597714 MFAP3

213134_x_at3.577332 BTG3

213135_at 4.450989 TIAM1

213139_at 3.127608 SNAI2

213143_at -1.76567 C2orf72

213151_s_at 2.024977 7-Sep

213158_at -1.5296

213169_at 8.729193 SEMA5A

213182_x_at26.35875 CDKN1C

213188_s_at 1.693616 MINA

213189_at 1.5653 MINA

213194_at 8.237331 ROBO1

213214_x_at1.622017 ACTG1

213233_s_at 1.594443 KLHL9

213236_at 2.773046 SASH1

213238_at 2.119106 ATP10D

213239_at 1.55496 PIBF1

213241_at 2.796009 PLXNC1

213243_at 1.833812 VPS13B

213248_at 2.959356 LOC730101

213249_at 3.724978 FBXL7

213260_at 4.312357 FOXC1

213272_s_at -1.58911 TMEM159

213285_at -2.6179 TMEM30B

213288_at 1.500189 MBOAT2

213293_s_at 3.728658 TRIM22

213294_at 1.903478 EIF2AK2

213295_at 1.920925 CYLD

213316_at 2.595697 KIAA1462

213317_at 12.69115 CLIC5

213318_s_at 1.688946 BAT3

213320_at 1.727616 PRMT3

213326_at 3.527282 VAMP1

213329_at 14.84955 SRGAP2

213340_s_at 1.797836 KIAA0495

213348_at 7.532814 CDKN1C

213355_at 8.556293 ST3GAL6

213361_at 2.740846 TDRD7

213362_at 2.22346 PTPRD

213364_s_at 3.160205 SNX1

213372_at 2.598111 PAQR3

213375_s_at 2.581296 N4BP2L1

213376_at 2.446676 ZBTB1

213380_x_at-1.75284 MSTP9

213381_at -1.54673 C10orf72

213386_at 1.753288 C9orf125

213388_at 6.954999 PDE4DIP

213404_s_at 2.205763 RHEB

213409_s_at 1.612515 RHEB

213413_at 5.361453 STON1

213415_at 1.899245 CLIC2

213417_at -1.69524 TBX2

213419_at 3.070612 APBB2

213422_s_at 6.816268 MXRA8

213423_x_at3.930005 TUSC3

213425_at 1.914735 WNT5A

213434_at 2.293867 STX2

213438_at 28.8453 NFASC

213446_s_at 2.333123 IQGAP1

213454_at -1.57088 APITD1 /// CORT

213455_at 3.660563 FAM114A1

213457_at -1.69862 MFHAS1

213480_at 1.711383 VAMP4

213483_at 1.673154 PPWD1

213489_at 1.994422 MAPRE2

213497_at -1.61882 ABTB2

213500_at 1.939769

213503_x_at9.573176 ANXA2

213506_at -1.74604 F2RL1

213508_at 1.520008 C14orf147

213510_x_at1.500313 LOC220594

213511_s_at 1.684277 MTMR1

213518_at 1.668774 PRKCI

213524_s_at 1.784434 G0S2

213531_s_at 1.54914 RAB3GAP1

213532_at 2.004336 ADAM17

213541_s_at 4.302641 ERG

213546_at 2.0287 DKFZP586I1420

213547_at 6.104436 CAND2

213572_s_at 1.705099 SERPINB1

213578_at 1.732929 BMPR1A

213581_at 1.52493 PDCD2

213592_at 1.912995 APLNR

213598_at 2.660008

213603_s_at 1.628184 RAC2

213616_at 3.040362 C18orf10

213617_s_at 1.922488 C18orf10

213618_at 1.989654 ARAP2

213619_at 1.593559 HNRNPH1

213620_s_at 4.466543 ICAM2

213628_at 2.195727 CLCC1

213632_at -1.61786 DHODH

213644_at 1.82374 CCDC46

213651_at -1.60108 INPP5J

213652_at 1.588053 PCSK5

213656_s_at 4.010654 KLC1

213657_s_at -1.79895

213658_at -1.55298

213661_at 4.804809 DKFZP586H2123

213673_x_at-1.51043 NENF

213675_at 7.576144

213677_s_at 1.537957 PMS1

213689_x_at-1.75544 FAM69A

213693_s_at -2.23626 MUC1

213695_at -2.01383 PON3

213698_at 2.137387 LOC100130633 /// ZMYM6

213714_at 4.978571 CACNB2

213715_s_at 3.339606 KANK3

213725_x_at3.759825 XYLT1

213727_x_at1.690429 MPPE1

213739_at 3.033872

213743_at 1.759658 CCNT2

213745_at 1.598749 ATRNL1

213750_at 1.584472 RSL1D1

213753_x_at-1.53983 EIF5A

213754_s_at 1.912454 PAIP1

213761_at 2.412749 MDM1

213775_x_at1.660772 ZNF638

213782_s_at 4.768293 MYOZ2

213795_s_at 2.306886 PTPRA

213797_at 2.270723 RSAD2

213800_at 4.837984 CFH

213803_at 1.593384

213813_x_at -2.00519

213817_at 2.342995 IRAK3

213822_s_at -1.57256 UBE3B

213828_x_at1.671579 H3F3A /// H3F3B /// LOC440926

213832_at 6.574335 KCND3

213839_at -1.64734 CLMN

213843_x_at-1.78731 SLC6A8

213845_at 6.089512 GRIK2

213846_at -1.79186 COX7C

213848_at 3.814536

213849_s_at 3.000755 PPP2R2B

213853_at 1.617304 DNAJC24

213857_s_at 2.627013 CD47

213858_at 1.785587 ZNF250

213860_x_at 1.52355 CSNK1A1

213864_s_at 1.632431 NAP1L1

213865_at 1.736081 DCBLD2

213869_x_at-1.65174 THY1

213871_s_at -1.66703 C6orf108

213874_at -1.71734 SERPINA4

213882_at 3.20501 TM2D1

213883_s_at 1.811289 TM2D1

213891_s_at 2.686348 TCF4

213894_at 8.004972 THSD7A

213905_x_at5.696881 BGN

213919_at -1.50735 DNAJC4

213921_at 4.600559 SST

213925_at -1.53856 C1orf95

213929_at 5.342075

213933_at -2.43899 PTGER3

213934_s_at 1.960791 ZNF23

213938_at 1.870778 ERC2

213940_s_at 2.001608 FNBP1

213967_at -2.08515 RALYL

213970_at 1.800282 RABL3

213975_s_at 6.557414 LYZ

213981_at 1.511782 COMT

213982_s_at 3.027824 RABGAP1L

213992_at 1.743317 COL4A6

213994_s_at -2.22206 SPON1

214000_s_at 2.301254 RGS10

214001_x_at-1.78259 RPS10

214004_s_at 2.260457 VGLL4

214012_at 1.944349 ERAP1

214014_at 3.359912 CDC42EP2

214016_s_at 1.687874 SFPQ

214020_x_at2.058866 ITGB5

214021_x_at2.014901 ITGB5

214022_s_at 2.655516 IFITM1

214023_x_at-2.47813 TUBB2B

214043_at 2.663953 PTPRD

214047_s_at 1.509184 MBD4

214053_at 1.993933 ERBB4

214055_x_at1.536324 BAT2D1

214072_x_at-1.52788 NENF

214077_x_at2.636836 MEIS3P1

214079_at 1.801448 DHRS2

214088_s_at -1.75589 FUT3

214095_at -1.76934 SHMT2

214096_s_at -1.74644 SHMT2

214097_at -1.72788 RPS21

214099_s_at 2.719606 PDE4DIP

214104_at 2.153873 GPR161

214106_s_at 3.500359 GMDS

214115_at 2.310663 VAMP5

214129_at 2.311191 PDE4DIP

214130_s_at 2.340645 PDE4DIP

214141_x_at2.143286 SFRS7

214146_s_at 1.885116 PPBP

214151_s_at 2.213609 CCPG1

214152_at 1.657502 CCPG1

214156_at 1.610479 MYRIP

214168_s_at 2.681851 TJP1

214174_s_at -1.71273 PDLIM4

214180_at -1.72105 MAN1C1

214182_at 2.966307 LOC100132430

214203_s_at -1.62505 PRODH

214212_x_a2.383328 FERMT2

214220_s_at 1.745087 ALMS1

214237_x_at -1.5269 PAWR

214247_s_at 3.168393 DKK3

214255_at 18.61047 ATP10A

214265_at 3.432418 ITGA8

214281_s_at 1.606402 RCHY1

214285_at -2.11127 FABP3

214293_at 2.700065 11-Sep

214307_at -1.53066 HGD /// LOC100132552 /// LOC727722

214314_s_at 2.360169 EIF5B

214319_at 5.687355 FRY

214321_at 3.337159 NOV

214323_s_at 1.678601 UPF3A

214331_at -1.55929 TSFM

214356_s_at 1.512036 KIAA0368

214358_at -1.59639 ACACA

214369_s_at 1.533355 RASGRP2

214370_at 2.765357 S100A8

214395_x_at-1.97269 EEF1D

214429_at 1.670389 MTMR6

214433_s_at -1.50161 SELENBP1

214434_at 2.575163 HSPA12A

214436_at 1.5343 FBXL2

214438_at 1.919732 HLX

214449_s_at 1.596962 RHOQ

214451_at -2.63413 TFAP2B

214453_s_at 3.534871 IFI44

214459_x_at2.515303 HLA-C

214475_x_at-2.18444 CAPN3

214490_at -1.79563 ARSF

214512_s_at 2.036608 SUB1

214548_x_at2.141544 GNAS

214581_x_at-1.94642 TNFRSF21

214596_at 1.633377 CHRM3

214598_at -2.48789 CLDN8

214602_at 2.899061 COL4A4

214606_at 3.464871 TSPAN2

214620_x_at2.233017 PAM

214639_s_at 2.506404 HOXA1

214641_at 2.990338 COL4A3

214651_s_at 1.561108 HOXA9

214656_x_at2.051513 MYO1C

214658_at 2.130515 TMED7

214660_at 1.929505 PELO

214663_at 1.78234 DSTYK

214670_at 2.167048 ZKSCAN1

214686_at 1.657841 ZNF266

214697_s_at 2.843244 ROD1

214703_s_at 2.502701 MAN2B2

214709_s_at 1.71667 KTN1

214721_x_at 1.831207 CDC42EP4

214722_at 3.391846 NOTCH2NL

214725_at 3.02822 C8orf84

214734_at 3.143672 EXPH5

214735_at -2.62641 PIP3-E

214736_s_at 1.760584 ADD1

214741_at 1.886908 ZNF131

214743_at 1.860309 CUX1

214761_at 4.817652 ZNF423

214763_at -2.20372 ACOT11

214764_at 1.502169 RRP15

214771_x_at1.608878 MPRIP

214774_x_at-1.84315 TOX3

214788_x_at9.163423 DDN

214798_at -1.66048 ATP2C2

214821_at 1.528291

214830_at -1.7872 SLC38A6

214843_s_at -1.56365 USP33

214848_at 1.704798

214853_s_at 2.196328 SHC1

214889_at -1.70789 FAM149A

214890_s_at -1.86127 FAM149A

214894_x_at 1.78297 MACF1

214920_at 6.365846 THSD7A

214927_at 2.917561 ITGBL1

214945_at 11.34383 FAM153A /// FAM153B /// FAM153C

214978_s_at 2.668644 PPFIA4

214999_s_at -1.77486 RAB11FIP3

215000_s_at 1.696889 FEZ2

215001_s_at 1.912694 GLUL

215016_x_at3.118442 DST

215017_s_at 2.335235 FNBP1L

215034_s_at 2.989397 TM4SF1

215051_x_at12.21115 AIF1

215059_at 28.79421

215076_s_at 4.157832 COL3A1

215089_s_at 1.678984 RBM10

215104_at 6.956747 NRIP2

215108_x_at-1.77611 TOX3

215111_s_at 2.017049 TSC22D1

215126_at -1.69172

215127_s_at 3.37995 RBMS1

215129_at -1.58683 PIK3C2G

215193_x_at2.561255 HLA-DRB1 /// HLA-DRB2 /// HLA-DRB3 /// HLA-DRB4 /// HLA-DRB5 /// LOC100133484 /// LOC100133661 /// LOC100133811 /// LOC730415 /// RNASE2 /// ZNF749

215222_x_at1.623551 MACF1

215235_at 3.876637 SPTAN1

215240_at 1.649197 ITGB3

215244_at -1.71366 DGCR5

215259_s_at 1.524878 CADM4

215287_at 1.505775

215299_x_at2.101367 SULT1A1

215306_at 8.254311

215313_x_at2.022316 HLA-A

215388_s_at 7.479016 CFH /// CFHR1

215389_s_at 17.31323 TNNT2

215393_s_at -1.59011 COBLL1

215440_s_at 2.931849 BEX4

215446_s_at 25.061 LOX

215464_s_at 1.545665 TAX1BP3

215493_x_at2.851363 BTN2A1

215506_s_at -1.57312 DIRAS3

215543_s_at 3.352118 LARGE

215548_s_at 1.735717 SCFD1

215584_at -1.57852 HECW1

215684_s_at 2.066911 ASCC2

215700_x_at -1.5183 CPNE6

215715_at 1.52331 SLC6A2

215735_s_at 1.773577 TSC2

215767_at 8.335465 ZNF804A

215785_s_at -1.84345 CYFIP2

215812_s_at -1.80913 LOC653562 /// SLC6A10P /// SLC6A8

215836_s_at 1.641407 PCDHGA1 /// PCDHGA10 /// PCDHGA11 /// PCDHGA12 /// PCDHGA2 /// PCDHGA3 /// PCDHGA4 /// PCDHGA5 /// PCDHGA6 /// PCDHGA7 /// PCDHGA8 /// PCDHGA9 /// PCDHGB1 /// PCDHGB2 /// PCDHGB3 /// PCDHGB4 /// PCDHGB5 /// PCDHGB6 /// PCDHGB7 /// PCDHGC3 /// PCDHGC4 /// PCDHGC5

215884_s_at 1.704665 UBQLN2

215913_s_at 1.643562 GULP1

215994_x_at1.568811 TBC1D9B

216033_s_at 5.6075 FYN

216107_at -1.53363 LOC100129503

216194_s_at 1.758351 TBCB

216210_x_at1.715111 TRIOBP

216215_s_at 1.91539 RBM9

216219_at -1.61328 AQP6

216224_s_at -1.53227 HDAC6

216231_s_at 3.703892 B2M

216261_at 2.925839 ITGB3

216264_s_at 2.426729 LAMB2

216320_x_at-1.79668 MST1

216321_s_at 1.718527 NR3C1

216338_s_at 1.600515 YIPF3

216368_s_at 1.8524 COL4A3

216399_s_at 2.094985 SCAPER

216438_s_at 3.899377 TMSB4X /// TMSL3

216526_x_at1.884563 HLA-C

216550_x_at1.565566 ANKRD12

216594_x_at-1.62621 AKR1C1

216595_at -1.57847

216620_s_at 3.583342 ARHGEF10

216640_s_at 1.760707 PDIA6

216671_x_at-1.58973 MUC8

216693_x_at1.699336 HDGFRP3

216698_x_at-2.09542 LOC441453 /// OR7E18P /// OR7E35P /// OR7E37P /// OR7E47P

216707_at -1.51978

216804_s_at 1.610889 PDLIM5

216836_s_at -1.71851 ERBB2

216894_x_at 12.02763 CDKN1C

216896_at 1.628312 COL4A3

216898_s_at 1.527436 COL4A3

216929_x_at-1.61816 ABO

217014_s_at -1.83057 AZGP1 /// AZGP1P1

217055_x_at-1.51588

217140_s_at -1.93201 LOC100133724 /// VDAC1

217177_s_at 2.812515 PTPRB

217196_s_at 3.623004 CAMSAP1L1

217221_x_at2.008538 RBM10

217283_at -1.50631

217289_s_at -1.71574 SLC37A4

217357_at -1.50729

217419_x_at 1.56193 AGRN

217452_s_at 7.379356 B3GALT2

217456_x_at2.167409 HLA-E

217478_s_at 1.873042 HLA-DMA

217484_at 4.316171 CR1

217499_x_at-1.72749 OR7E37P

217512_at -2.66222 KNG1

217520_x_at1.705017 LOC731884

217525_at 1.780503 OLFML1

217526_at 1.729272 NFATC2IP

217551_at -1.92059 LOC441453

217552_x_at10.66752 CR1

217568_at -1.62135 FAM12A

217585_at 1.809139 NEBL

217597_x_at-1.60385 RAB40B

217621_at 1.744218

217623_at 23.64687 MYLK3

217627_at 1.776835 ZNF573

217628_at 5.973451 CLIC5

217673_x_at1.652725 GNAS

217721_at 2.685317

217728_at 2.299288 S100A6

217732_s_at 1.575957 ITM2B

217733_s_at 2.072556 TMSB10

217743_s_at 1.988355 TMEM30A

217757_at 2.900321 A2M

217759_at 1.864527 TRIM44

217762_s_at 3.755288 RAB31

217763_s_at 6.896464 RAB31

217764_s_at 6.680782 RAB31

217766_s_at 1.722586 TMEM50A

217770_at 1.936305 PIGT

217781_s_at 1.823055 ZFP106

217806_s_at -1.62213 POLDIP2

217809_at -1.86007 BZW2

217816_s_at 1.756003 PCNP

217823_s_at 2.176814 UBE2J1

217827_s_at -1.52164 SPG21

217833_at 1.712654 SYNCRIP

217836_s_at 1.70077 YY1AP1

217837_s_at 1.689518 VPS24

217838_s_at 2.67251 EVL

217842_at 1.638712 LUC7L2

217843_s_at 3.048846 MED4

217848_s_at 2.114395 PPA1

217853_at 3.146725 TNS3

217858_s_at 2.318467 ARMCX3

217862_at 1.803363 PIAS1

217863_at 1.596906 PIAS1

217864_s_at 1.674282 PIAS1

217867_x_at-2.31382 BACE2

217875_s_at 2.435097 PMEPA1

217879_at 1.700098 CDC27

217886_at 1.705357 EPS15

217890_s_at 5.738738 PARVA

217896_s_at 1.795351 NIP30

217897_at 2.300237 FXYD6

217904_s_at 2.01634 BACE1

217908_s_at 1.535696 IQWD1

217920_at 1.697946 MAN1A2

217941_s_at 2.044916 ERBB2IP

217942_at -1.56736 MRPS35

217945_at 2.060914 BTBD1

217946_s_at 1.829469 SAE1

217949_s_at 1.793506 VKORC1

217952_x_at1.670324 PHF3

217956_s_at 2.136397 ENOPH1

217957_at 1.694576 C16orf80

217967_s_at 3.29921 FAM129A

217974_at -1.79515 TM7SF3

217975_at 2.547729 WBP5

217977_at -2.05043 SEPX1

217978_s_at 1.751604 UBE2Q1

217983_s_at 1.690788 RNASET2

217984_at 1.600614 RNASET2

217995_at 2.864538 SQRDL

218005_at 1.56029 ZNF22

218009_s_at 1.601408 PRC1

218018_at -1.55037 PDXK

218026_at -1.52067 CCDC56

218029_at 9.124029 FAM65A

218035_s_at -1.61821 RBM47

218037_at -1.64329 FAM134A

218042_at 1.748911 COPS4

218047_at 2.03967 OSBPL9

218055_s_at 2.062672 WDR41

218062_x_at1.735577 CDC42EP4

218065_s_at 1.569573 TMEM9B

218071_s_at 1.731183 MKRN2

218086_at 1.877531 NPDC1

218107_at 1.593761 WDR26

218113_at 2.021123 TMEM2

218124_at -1.64086 RETSAT

218127_at 1.611095 NFYB

218128_at 1.508569 NFYB

218134_s_at 1.758407 RBM22

218135_at 2.40445 ERGIC2

218144_s_at 2.188619 INF2

218146_at 1.835388 GLT8D1

218147_s_at 3.392702 GLT8D1

218152_at 1.502027 HMG20A

218158_s_at 1.66217 APPL1

218161_s_at -1.51234 CLN6

218162_at -1.91034 OLFML3

218166_s_at 1.509852 RSF1

218168_s_at -1.58116 CABC1

218171_at 1.580349 VPS4B

218181_s_at 3.111137 MAP4K4

218186_at -1.62707 RAB25

218187_s_at 2.077527 C8orf33

218188_s_at -1.5813 TIMM13

218192_at 2.130947 IP6K2

218204_s_at 1.673012 FYCO1

218221_at 1.97734 ARNT

218223_s_at 2.831401 PLEKHO1

218224_at 2.551419 PNMA1

218236_s_at 1.68853 PRKD3

218237_s_at -1.98636 SLC38A1

218238_at 1.650621 GTPBP4

218241_at 2.113404 GOLGA5

218244_at 1.627055 NOL8

218247_s_at 1.980124 MEX3C

218249_at 9.759148 ZDHHC6

218256_s_at 1.517405 NUP54

218261_at -1.9656 AP1M2

218272_at -1.71072 TTC38

218275_at -1.77363 SLC25A10

218276_s_at 1.912176 SAV1

218288_s_at 1.635105 CCDC90B

218290_at -1.73977 PLEKHJ1

218292_s_at -1.67675 PRKAG2

218303_x_at1.885532 KRCC1

218309_at -1.7175 CAMK2N1

218311_at 2.156113 MAP4K3

218312_s_at 1.662387 ZSCAN18

218318_s_at 2.420559 NLK

218322_s_at 2.389752 ACSL5

218324_s_at -1.70924 SPATS2

218332_at 1.542121 BEX1

218334_at 1.541106 THOC7

218348_s_at 1.585415 ZC3H7A

218370_s_at 1.549333 S100PBP

218371_s_at 2.055812 PSPC1

218380_at 8.857596 NLRP1

218386_x_at1.924314 USP16

218392_x_at-1.59679 SFXN1

218396_at 1.798312 VPS13C

218397_at 4.142217 FANCL

218401_s_at 1.559853 ZNF281

218415_at 1.547765 VPS33B

218417_s_at 2.865993 SLC48A1

218418_s_at 2.89795 KANK2

218421_at 1.512598 CERK

218422_s_at 1.700677 RBM26

218428_s_at 1.925499 REV1

218432_at 2.165826 FBXO3

218446_s_at 1.859276 FAM18B

218450_at 2.754452 HEBP1

218451_at -1.57067 CDCP1

218454_at 3.727122 FLJ22662

218459_at 2.279557 TOR3A

218472_s_at 2.195371 PELO

218489_s_at -1.59469 ALAD

218490_s_at 2.853196 ZNF302

218496_at 1.940037 RNASEH1

218501_at 9.383688 ARHGEF3

218503_at 1.702373 KIAA1797

218507_at 1.572287 HIG2

218510_x_at4.416921 FAM134B

218511_s_at -1.66341 PNPO

218518_at 3.026998 FAM13B1

218519_at 1.630985 SLC35A5

218528_s_at 2.475278 RNF38

218532_s_at 2.219555 FAM134B

218534_s_at 1.90198 AGGF1

218538_s_at 1.724567 MRS2

218545_at 4.675046 CCDC91

218557_at -1.73218 NIT2

218559_s_at 16.80474 MAFB

218569_s_at 1.573586 KBTBD4

218570_at 1.8387 KBTBD4 /// PTPMT1

218572_at 1.534042 CHMP4A

218587_s_at 3.099318 KTELC1

218589_at 1.812555 P2RY5

218595_s_at 1.857762 HEATR1

218597_s_at -1.52002 CISD1

218603_at 3.128306 HECA

218604_at 1.533937 LEMD3

218611_at 2.954508 IER5

218613_at 4.255173 PSD3

218614_at 2.67134 C12orf35

218616_at 2.830066 INTS12

218618_s_at 2.857826 FNDC3B

218622_at 1.955792 NUP37

218625_at 2.25163 NRN1

218626_at 1.742132 EIF4ENIF1

218628_at 1.724191 CCDC53

218637_at 1.958494 IMPACT

218638_s_at 1.725918 SPON2

218645_at 2.582253 ZNF277

218646_at 1.58266 C4orf27

218649_x_at 1.79919 SDCCAG1

218652_s_at 1.992482 PIGG

218653_at -1.72165 SLC25A15

218656_s_at 8.321714 LHFP

218659_at 1.552726 ASXL2

218667_at 2.818998 PJA1

218677_at -1.72461 S100A14

218678_at 19.78395 NES

218682_s_at 1.874953 SLC4A1AP

218684_at -1.50044 LRRC8D

218692_at 2.311424 GOLSYN

218694_at 2.44817 ARMCX1

218697_at 1.584975 NCKIPSD

218700_s_at -2.09701 RAB7L1

218701_at -1.51108 LACTB2

218704_at -1.5784 RNF43

218710_at 1.519852 TTC27

218713_at 1.82009 NARG2

218717_s_at 3.289661 LEPREL1

218729_at 2.226542 LXN

218736_s_at 2.105712 PALMD

218746_at 1.683582 TAPBPL

218747_s_at 1.871499 TAPBPL

218757_s_at 2.601654 UPF3B

218761_at 1.625154 RNF111

218764_at 3.132989 PRKCH

218766_s_at -1.57786 WARS2

218780_at -1.54034 HOOK2

218792_s_at -2.14 BSPRY

218796_at -1.84591 FERMT1

218801_at 2.409961 UGCGL2

218802_at 3.91801 CCDC109B

218805_at 3.054943 GIMAP5

218806_s_at -1.95237 VAV3

218807_at -1.68686 VAV3

218815_s_at -1.80666 TMEM51

218816_at 1.560883 LRRC1

218820_at 3.399005 C14orf132

218823_s_at 2.358107 KCTD9

218824_at 2.139024 PNMAL1

218826_at -1.71181 SLC35F2

218827_s_at 1.649225 CEP192

218829_s_at 1.806145 CHD7

218852_at 1.745155 PPP2R3C

218854_at 2.278096 DSE

218856_at -1.72891 TNFRSF21

218862_at -1.76725 ASB13

218871_x_at2.000922 CSGALNACT2

218876_at 14.53775 TPPP3

218877_s_at 1.539462 TRMT11

218878_s_at 1.548299 SIRT1

218893_at -1.80769 ISOC2

218905_at 1.689096 INTS8

218916_at -1.58273 ZNF768

218922_s_at -1.52248 LASS4

218927_s_at 2.156777 CHST12

218931_at -1.84366 RAB17

218932_at 2.232734 ZNHIT6

218935_at 16.03134 EHD3

218939_at -1.5525 LETM1

218950_at 1.832376 ARAP3

218953_s_at 1.630318 PCYOX1L

218959_at -1.93964 HOXC10

218965_s_at -1.52804 TUT1

218966_at 2.656235 MYO5C

218974_at 2.34402 SOBP

218983_at 1.652224 C1RL

218986_s_at 3.849321 DDX60

218993_at -1.54881 RNMTL1

219014_at 1.658864 PLAC8

219023_at -2.13463 C4orf16

219029_at 2.193013 C5orf28

219030_at 1.699196 TPRKB

219032_x_at1.669651 OPN3

219051_x_at-1.66621 METRN

219054_at 2.300784 C5orf23

219064_at 7.192343 ITIH5

219076_s_at -1.93584 PXMP2

219090_at 2.252573 SLC24A3

219100_at 3.845156 OBFC1

219112_at 1.688472 RAPGEF6

219116_s_at 1.679014 DCUN1D2

219126_at 1.874125 PHF10

219127_at -1.87552 ATAD4

219134_at 3.626782 ELTD1

219142_at 7.285071 RASL11B

219144_at -1.5369 DUSP26

219150_s_at -1.54608 ADAP1

219162_s_at -1.60513 MRPL11

219165_at 4.102115 PDLIM2

219168_s_at -1.67309 PRR5

219172_at -1.56031 UBTD1

219178_at 2.177543 QTRTD1

219182_at 1.724551 FLJ22167

219192_at 2.035557 UBAP2

219195_at -1.72788 PPARGC1A

219201_s_at 2.090615 TWSG1

219209_at 1.708813 IFIH1

219213_at 2.210178 JAM2

219215_s_at -1.95554 SLC39A4

219221_at 1.841149 ZBTB38

219223_at -1.56769 C9orf7

219229_at 2.500188 SLCO3A1

219232_s_at -1.79642 EGLN3

219235_s_at 4.794341 PHACTR4

219242_at 1.558951 CEP63

219243_at 3.531174 GIMAP4

219245_s_at -1.57851 OGFOD2

219250_s_at 3.231877 FLRT3

219259_at -1.50313 SEMA4A

219263_at -1.64553 RNF128

219265_at -1.62473 MOBKL2B

219268_at -1.54956 ETNK2

219269_at 1.845813 HMBOX1

219277_s_at -1.70747 OGDHL

219278_at 2.066907 MAP3K6

219283_at 1.955152 C1GALT1C1

219295_s_at 37.76555 PCOLCE2

219297_at 1.533995 WDR44

219298_at -2.14564 ECHDC3

219303_at 2.318307 RNF219

219304_s_at 4.978182 PDGFD

219305_x_at1.818014 FBXO2

219310_at -1.91015 C20orf39

219315_s_at 4.905951 TMEM204

219317_at 1.994299 POLI

219321_at 4.74765 MPP5

219327_s_at -1.79494 GPRC5C

219336_s_at 1.578604 ASCC1

219352_at 1.536606 HERC6

219353_at 1.871049 NHLRC2

219356_s_at 1.658714 CHMP5

219357_at 2.049293 GTPBP1

219358_s_at -1.55687 ADAP2

219368_at 2.300422 NAP1L2

219371_s_at 2.296175 KLF2

219376_at 1.541912 ZNF322B

219378_at 1.554808 NARG1L

219386_s_at 2.387221 SLAMF8

219389_at -1.58105 SUSD4

219394_at 1.838263 PGS1

219395_at -1.54308 RBM35B

219405_at 1.747915 TRIM68

219410_at 7.334218 TMEM45A

219413_at -1.60699 ACBD4

219418_at -1.5538 NHEJ1

219429_at -1.69652 FA2H

219436_s_at 11.06385 EMCN

219437_s_at 1.882478 ANKRD11

219440_at 1.894853 RAI2

219443_at 1.998531 TASP1

219463_at 2.127464 C20orf103

219474_at -1.76106 C3orf52

219476_at -1.64024 C1orf116

219478_at 1.527762 WFDC1

219479_at 1.738582 KDELC1

219489_s_at 6.783703 NXN

219505_at 2.201899 CECR1

219508_at -1.52257 GCNT3

219509_at 1.643448 MYOZ1

219520_s_at 3.648666 WWC3

219523_s_at 1.975775 ODZ3

219532_at 4.534345 ELOVL4

219533_at 1.912129 CDKN1C

219534_x_at15.64299 CDKN1C

219540_at 1.520663 ZNF267

219548_at 1.659315 ZNF16

219553_at 2.586306 NME7

219554_at -1.80761 RHCG

219563_at 2.059196 C14orf139

219570_at 1.838398 KIF16B

219571_s_at 1.585117 ZNF12

219572_at -1.75219 CADPS2

219578_s_at 2.238561 CPEB1

219600_s_at 1.852468 TMEM50B

219602_s_at 1.714799 FAM38B

219616_at -1.62845 ACSS3

219640_at -1.55328 CLDN15

219659_at 1.977889 ATP8A2

219660_s_at 2.739742 ATP8A2

219664_s_at -1.53724 DECR2

219667_s_at 2.275351 BANK1

219682_s_at 2.559459 TBX3

219684_at 2.725245 RTP4

219686_at -2.04202 STK32B

219688_at 1.503648 BBS7

219689_at 22.68835 SEMA3G

219709_x_at -1.7988 FAM173A

219722_s_at -1.67983 GDPD3

219723_x_at-1.65403 AGPAT3

219732_at -2.77855 RP11-35N6.1

219735_s_at -2.06248 TFCP2L1

219741_x_at-1.66554 ZNF552

219747_at 39.13903 C4orf31

219759_at 1.600025 ERAP2

219767_s_at 1.974927 CRYZL1

219768_at -2.01377 VTCN1

219777_at 5.587236 GIMAP6

219778_at 4.243164 ZFPM2

219796_s_at -2.00466 MUPCDH

219806_s_at -1.66748 C11orf75

219821_s_at 1.821411 GFOD1

219825_at 2.30255 CYP26B1

219833_s_at 1.920437 EFHC1

219836_at 2.474291 ZBED2

219848_s_at 1.658703 ZNF432

219858_s_at 1.739261 MFSD6

219866_at 15.99272 CLIC5 /// LOC100131610

219869_s_at -1.56673 SLC39A8

219880_at 1.844953

219883_at -1.51139 C11orf20

219889_at 1.820193 FRAT1

219891_at -1.62201 PGPEP1

219894_at 1.538307 MAGEL2

219909_at 1.778311 MMP28

219922_s_at 2.402071 LTBP3

219937_at -1.80544 TRHDE

219945_at -1.58353 DDX25

219946_x_at-1.64338 MYH14

219949_at 22.78788 LRRC2

219972_s_at 2.167978 C14orf135 /// LOC100130173

219975_x_at1.621056 OLAH

219985_at 7.461958 HS3ST3A1

219986_s_at -1.51337 ACAD10

219988_s_at 2.991898 RNF220

219999_at 2.030609 MAN2A2

220016_at 1.64768 AHNAK

220024_s_at 1.678853 PRX

220044_x_at1.594142 CROP

220059_at -1.99842 STAP1

220074_at -1.86779 MUPCDH

220087_at -1.63342 BCMO1

220105_at -1.74095 RTDR1

220110_s_at 1.902462 NXF3

220115_s_at 2.428465 CDH10

220116_at -2.09924 KCNN2

220134_x_at2.003618 FAM176B

220141_at 1.579009 C11orf63

220145_at 1.507808 MAP9

220150_s_at -1.53916 FAM184A

220161_s_at -2.68151 EPB41L4B

220167_s_at 1.803616 LOC729355 /// TP53TG3

220186_s_at -1.57075 PCDH24

220189_s_at 1.501028 MGAT4B

220197_at -2.41894 ATP6V0A4

220230_s_at 1.906001 CYB5R2

220236_at -1.55383 PDPR

220240_s_at 2.516076 TMCO3

220248_x_at1.585036 NSFL1C

220303_at -1.73153 PDZD3

220308_at 3.001244 CCDC19

220316_at 2.437983 NPAS3

220319_s_at 5.086461 MYLIP

220323_at -1.53833 CNTD2

220326_s_at 2.45116 FLJ10357

220331_at -1.8134 CYP46A1

220333_at -1.96023 PAQR5

220346_at 1.827452 MTHFD2L

220357_s_at -1.93676 SGK2

220381_at 3.491828 ARHGAP28

220382_s_at 3.986498 ARHGAP28

220397_at 2.066663 MDM1

220419_s_at 1.544654 USP25

220424_at 19.06251 NPHS2

220441_at -1.82868 DNAJC22

220495_s_at 1.797627 TXNDC15

220510_at -1.68482 RHBG

220532_s_at -2.02416 TMEM176B

220538_at -1.53543 ADM2

220554_at -2.0182 SLC22A7

220625_s_at -2.26983 ELF5

220642_x_at-1.56971 GPR89A /// GPR89B /// GPR89C

220659_s_at -1.57079 C7orf43

220723_s_at -1.66591 FLJ21511

220727_at -1.7411 KCNK10

220731_s_at 1.583199 NECAP2

220733_at -1.58492 SLC26A1

220740_s_at -1.53182 SLC12A6

220746_s_at 1.665804 UIMC1

220750_s_at 1.518846 LEPRE1

220751_s_at 1.605092 C5orf4

220761_s_at 2.277557 TAOK3

220765_s_at 3.094178 LIMS2

220770_s_at 3.006994 LOC63920

220819_at 1.512808 FRMD1

220825_s_at 3.267185 KIRREL

220889_s_at 8.018915 CA10

220890_s_at 1.551419 DDX47

220892_s_at -1.59492 PSAT1

220923_s_at -1.52648 PNMA3

220933_s_at 1.751715 ZCCHC6

220936_s_at 7.268448 H2AFJ

220939_s_at 2.006413 DPP8

220944_at -1.52818 PGLYRP4

220945_x_at4.372392 MANSC1

220948_s_at -1.73662 ATP1A1

220977_x_at3.129397 EPB41L5

220999_s_at -1.74452 CYFIP2

221007_s_at 1.684654 FIP1L1

221011_s_at 2.407091 LBH

221014_s_at 1.646049 RAB33B

221016_s_at 7.262209 TCF7L1

221023_s_at -1.62049 KCNH6

221024_s_at 4.971035 SLC2A10

221042_s_at -1.70326 CLMN

221081_s_at -1.65856 DENND2D

221193_s_at 1.708925 ZCCHC10

221203_s_at 2.096849 YEATS2

221207_s_at 2.19234 NBEA

221213_s_at 2.083825 ZNF280D

221215_s_at -2.12644 RIPK4

221230_s_at 1.68552 ARID4B

221232_s_at -1.57577 ANKRD2

221253_s_at 1.560658 TXNDC5

221260_s_at 2.255335 CSRNP2

221264_s_at 1.568615 LOC100128223 /// TARDBP

221270_s_at -1.84962 QTRT1

221272_s_at 4.306554 C1orf21

221281_at -1.54353 SRC

221290_s_at 2.044067 MUM1

221305_s_at -2.09578 UGT1A6 /// UGT1A8 /// UGT1A9

221333_at -1.50362 FOXP3

221362_at -1.58254 HTR5A

221381_s_at 1.625229 MORF4 /// MORF4L1

221419_s_at -1.53946

221449_s_at 1.891609 ITFG1

221452_s_at -1.8666 TMEM14B

221471_at 2.135681 SERINC3

221472_at 2.379165 SERINC3

221473_x_at1.993869 SERINC3

221483_s_at 1.581664 ARPP-19

221486_at 2.185728 ENSA

221489_s_at 1.677104 SPRY4

221491_x_at1.984791 HLA-DRB1 /// HLA-DRB2 /// HLA-DRB3 /// HLA-DRB4 /// HLA-DRB5 /// LOC100133484 /// LOC100133661 /// LOC100133811 /// LOC730415 /// LOC731718 /// RNASE2 /// ZNF749

221492_s_at 2.007859 ATG3

221511_x_at2.279226 CCPG1

221513_s_at 1.539855 UTP14A /// UTP14C

221514_at 1.67682 UTP14A

221517_s_at 1.562595 MED17

221524_s_at -2.02851 RRAGD

221527_s_at 2.775118 PARD3

221528_s_at 1.793634 ELMO2

221530_s_at 1.653078 BHLHE41

221538_s_at 2.789037 PLXNA1

221550_at -1.69035 COX15

221552_at -1.85592 ABHD6 /// LOC643635

221555_x_at-1.68037 CDC14B

221559_s_at 1.946033 MIS12

221564_at 2.050944 PRMT2

221566_s_at 1.553901 NOL3

221567_at 2.002472 NOL3

221569_at 1.786373 AHI1

221570_s_at 2.283107 METTL5

221571_at 2.671341 TRAF3

221607_x_at1.571419 ACTG1

221622_s_at 1.713599 TMEM126B

221627_at -1.63867 TRIM10

221641_s_at 1.644537 ACOT9

221653_x_at1.745638 APOL2

221661_at -1.75906 SLC22A7

221662_s_at -1.9693 SLC22A7

221664_s_at -1.51085 F11R

221667_s_at 3.891567 HSPB8

221683_s_at 1.592248 CEP290

221698_s_at 1.511766 CLEC7A

221699_s_at 1.576266 DDX50

221701_s_at -1.7178 STRA6

221710_x_at2.562169 FAM176B /// LOC100133999

221725_at 1.911315

221731_x_at 2.84107 VCAN

221735_at 1.641486 WDR48

221736_at 1.511938 KIAA1219

221740_x_at1.894761 LRRC37A2

221756_at 2.765069 PIK3IP1

221766_s_at 1.71009 FAM46A

221771_s_at 2.143566 MPHOSPH8

221773_at 3.841809 ELK3

221776_s_at 1.826653 BRD7

221781_s_at 1.693506 DNAJC10

221782_at 2.065255 DNAJC10

221786_at 1.662762 C6orf120

221787_at 1.755817 C6orf120

221794_at 1.595645 DOCK6

221806_s_at 1.643955 SETD5

221816_s_at 1.839868 PHF11

221820_s_at 1.735307 MYST1

221832_s_at 1.865276 LUZP1

221834_at 1.670664 LONP2

221839_s_at 1.636021 UBAP2

221840_at 1.728928 PTPRE

221843_s_at 1.592676 KIAA1609

221853_s_at 1.520961 NOMO1 /// NOMO2 /// NOMO3

221861_at 2.829643

221868_at -1.56197 PAIP2B

221870_at 2.256311 EHD2

221872_at -1.61971 RARRES1

221875_x_at2.418618 HLA-F

221878_at 2.142144 C2orf68

221880_s_at 2.509171 FAM174B

221881_s_at -1.5922 CLIC4

221883_at 1.729469 PKNOX1

221884_at -1.957 EVI1

221898_at 18.89588 PDPN

221935_s_at 2.151296 C3orf64

221950_at -1.91381 EMX2

221957_at -1.87754 PDK3

221958_s_at -2.45688 GPR177

221985_at -1.66692 KLHL24

221988_at 1.716826 C19orf42

222011_s_at -1.5124 TCP1

222028_at 1.557108 ZNF45

222033_s_at 4.537776

222035_s_at 2.366188 PAPOLA

222041_at 1.633016 DPH1 /// OVCA2

222043_at -1.73421 CLU

222062_at 2.227679 IL27RA

222073_at 7.895105 COL4A3

222078_at -1.80031 PKLR

222108_at 18.60209 AMIGO2

222111_at 1.760336

222122_s_at 1.624651 THOC2

222125_s_at 2.170332 P4HTM

222127_s_at 2.275456 EXOC1

222140_s_at -1.74346 GPR89A /// GPR89B /// GPR89C

222146_s_at 1.612702 TCF4

222154_s_at 1.805435 LOC26010

222156_x_at 2.641848 CCPG1

222182_s_at 1.702171 CNOT2

222201_s_at 2.082061 CASP8AP2

222217_s_at 1.940019 SLC27A3

222230_s_at 1.614933 ACTR10

222235_s_at 3.203492 CSGALNACT2

222237_s_at 2.056785 ZFP112

222244_s_at 1.680107 TUG1

222291_at -2.12627 FAM149A

222294_s_at 2.522038

222302_at -1.53452

222304_x_at-1.85273 OR7E47P

222333_at 1.601937 ALS2CL

243_g_at 1.587141 MAP4

31835_at -1.74559 HRG

31845_at 2.776704 ELF4

31874_at 1.853208 GAS2L1

32625_at 4.398424 NPR1

32811_at 1.89073 MYO1C

336_at 6.46032 TBXA2R

34726_at 1.517842 CACNB3

34858_at 1.761615 KCTD2

36030_at 2.141873 IFFO1

36475_at -1.52132 GCAT

36545_s_at 1.965801 SFI1

36552_at 1.586333 C2CD3

36553_at 2.056991 ASMTL

36554_at 2.103345 ASMTL

36612_at 1.612085 FAM168A

37384_at 1.765363 PPM1F

37408_at 3.548192 MRC2

37577_at 15.75474 ARHGAP19

37590_g_at -1.6781

38149_at 2.097125 ARHGAP25

38158_at -1.80113 ESPL1

38241_at 1.883256 BTN3A3

38671_at 2.441066 PLXND1

38691_s_at -1.57397 SFTPC

39248_at -1.7837 AQP3

39582_at 1.63615 CYLD

39817_s_at -1.90204 C6orf108

40093_at 2.181901 BCAM

40148_at 3.315681 APBB2

40524_at 1.790948 PTPN21

40560_at -1.79241 TBX2

40687_at 2.311567 GJA4

41644_at 2.523503 SASH1

43511_s_at 7.04691

44111_at 1.682976 VPS33B

45288_at -1.83105 ABHD6 /// LOC643635

45297_at 2.610442 EHD2

45749_at 6.42015 FAM65A

46270_at 1.592918 UBAP1

46665_at 1.73872 SEMA4C

47069_at -2.23546 PRR5

47571_at -1.7112 ZNF236

48106_at 2.893433 SLC48A1

49111_at 4.170723

49306_at -1.88839 RASSF4

50400_at -1.70663 PAOX

51158_at 1.983907 FAM174B

51176_at 2.020854 LOC100131612 /// MED27

53720_at 1.528238 C19orf66

55093_at 1.513694 CSGLCA-T

55692_at 2.100712 ELMO2

55872_at 1.58911 ZNF512B

56197_at 1.585918 PLSCR3

57588_at 2.854557 SLC24A3

58780_s_at 5.223355 FLJ10357

59625_at 2.116297 NOL3

61874_at -1.54166 C9orf7

64064_at 2.747115 GIMAP5

64900_at 1.978194 FLJ22167

65472_at 2.319344 C2orf68

65517_at -1.86928 AP1M2

77508_r_at -1.50311 LOC100133585 /// RABEP2

823_at 1.821994 CX3CL1

90265_at -1.52015 ADAP1

AFFX-BioB-3_at -1.64033

AFFX-BioB-5_at -1.54189

AFFX-BioC-5_at -1.5022

AFFX-HSAC07/X00351_M_at 1.561212

ACTB

AFFX-HUMISGF3A/M97935_3_at 3.669611

STAT1

AFFX-M27830_5_at -1.57802

AFFX-r2-Ec-bioB-3_at -1.58172

AFFX-r2-Ec-bioC-5_at -1.53424
